# 1 **Non-random segregation of sister chromosomes by *Escherichia coli*** 2 **MukBEF axial cores**

3  
4 **Jarno Mäkelä, Stephan Uphoff, David J. Sherratt**

5  
6 Department of Biochemistry, University of Oxford, Oxford OX1 3QU, UK  
7 Correspondence to: [jarno.makela@bioch.ox.ac.uk](mailto:jarno.makela@bioch.ox.ac.uk); [david.sherratt@bioch.ox.ac.uk](mailto:david.sherratt@bioch.ox.ac.uk)

## 8 9 **Summary**

10 The *Escherichia coli* structural maintenance of chromosomes complex, MukBEF, forms axial  
11 cores to chromosomes that determine their spatio-temporal organization. Here, we show  
12 that axial cores direct chromosome arms to opposite poles and generate the translational  
13 symmetry between newly replicated sister chromosomes. MatP, a replication terminus (*ter*)  
14 binding protein prevents chromosome rotation around the longitudinal cell axis by  
15 displacing MukBEF from *ter*, thereby maintaining the linear shape of axial cores. During DNA  
16 replication, MukBEF action directs lagging strands towards the cell center, marked by  
17 accumulation of DNA-bound  $\beta_2$ -clamps in the wake of replisomes, in a process necessary for  
18 the translational symmetry of sister chromosomes. Finally, the ancestral ('immortal')  
19 template DNA strand, propagated from previous generations, is preferentially inherited by  
20 the cell forming at the old pole, dependent on MukBEF-MatP. The work demonstrates how  
21 chromosome organization-segregation can foster non-random inheritance of genetic  
22 material and provides a framework for understanding how chromosome conformation and  
23 dynamics shape subcellular organization.

24  
25 **Keywords:** MatP/MukBEF/non-random segregation/replication/SMC

## 26 27 **Introduction**

28 Faithful chromosome propagation and inheritance underpin all replicative life. Organisms  
29 have evolved a vast range of mechanisms to ensure timely replication and segregation of  
30 genetic material. Despite this diversity, highly conserved Structural Maintenance of  
31 Chromosomes (SMC) complexes play a central role in the organization of chromosomes in  
32 all domains of life. Eukaryotic cells orchestrate replication and segregation in discrete stages  
33 where newly replicated sister chromosomes are first individualized by condensin and held  
34 together by cohesin before being pulled apart by action of the mitotic spindle and cleavage  
35 of cohesin (reviewed in (Uhlmann, 2016)). In contrast, in prokaryotes, chromosome  
36 replication and segregation are generally not temporally separated and occur progressively  
37 (Kuzminov, 2014). Because divergent species have evolved different solutions to the same  
38 problem, understanding the contributions of different mechanisms and physical constraints  
39 underlying robust chromosome segregation remains a challenge (Badrinarayanan et al.,  
40 2015; Surovtsev and Jacobs-Wagner, 2018; Wang et al., 2013).

41 Genetic studies have identified two major classes of proteins implicated in  
42 chromosome segregation in bacteria. First, structural maintenance of chromosomes (SMC)

43 complexes, MukBEF, MksBEF and Smc-ScpAB, were initially identified in a screen for  
44 *Escherichia coli* mutants that generated anucleate cells as a consequence of a failure to  
45 segregate newly replicated chromosomes to daughter cells (Hiraga et al., 1989; Nolivos and  
46 Sherratt, 2014). Second, studies of low copy plasmid stability identified ParABS systems,  
47 which subsequently were shown to have roles in chromosome segregation in many  
48 organisms (Surovtsev and Jacobs-Wagner, 2018). While many bacteria encode one or both  
49 of these systems, some, for example *Pseudomonas aeruginosa*, encode two different SMCs  
50 and a ParABS system (Petrushenko et al., 2011; Vallet-Gely and Boccard, 2013).  
51 Nevertheless, deletion of SMC or ParAB proteins has frequently modest if any consequences  
52 for chromosome segregation. Consistent with this, it has been proposed that large bacterial  
53 chromosomes can utilise repelling entropic effects to facilitate separation of bacterial  
54 chromosomes (Jun and Mulder, 2006), unlike much smaller low copy number plasmids that  
55 require a functional ParABS system for faithful segregation (Surovtsev and Jacobs-Wagner,  
56 2018). Whatever roles entropic forces may play, studies in diverse bacterial species have  
57 demonstrated that chromosomal loci are not positioned randomly in cells (Fogel and  
58 Waldor, 2005; Umbarger et al., 2011; Vallet-Gely and Boccard, 2013; Wang et al., 2005,  
59 2006, 2014), and that in *E. coli*, MukBEF complexes play an important role in correct  
60 positioning of replication origins and other loci by forming an axial core to the chromosome  
61 (Danilova et al., 2007; Mäkelä and Sherratt, 2020). Absence of MukBEF leads to formation of  
62 anucleate cells during growth and loss of viability at temperatures higher than 22 °C in rich  
63 media (Danilova et al., 2007; Niki and Jaffe, 1991).

64 In new-born *E. coli* cells with non-overlapping replication cycles, origins of replication  
65 (*oriC*) are positioned close to the cell center, and the left and right chromosome arms are  
66 linearly organized in separate cell halves. Chromosome replication-segregation leads to  
67 generation of daughter cells with a chromosome organization identical to their mother cell.  
68 Most cells adopt a *left-oriC-right-left-oriC-right (L-R-L-R)* translational symmetry prior to  
69 division (Wang et al., 2006), which requires that either the leading or lagging strand  
70 templates are symmetrically segregated to the cell poles (Toro and Shapiro, 2010; Wang et  
71 al., 2005). In agreement, an elegant chromosome degradation experiment showed that the  
72 leading strand templates are segregated towards the cell poles in most cells (White et al.,  
73 2008). In theory, cells could also control the fate of the old template strand by non-random  
74 segregation, designating the destination for each strand. During each replication cycle, there  
75 is a risk of the new strand not faithfully copying the information from the template strand.  
76 ‘Immortal’ (or ancestral) strand retention was originally proposed as a strategy to maintain  
77 DNA purity in stem cells while the copied strands, potentially carrying mutations from  
78 replication, were segregated to non-stem cell progeny (Cairns, 1975). Whether this strategy  
79 is actually utilized by stem cells remains controversial (Lansdorp, 2007; Rando, 2007;  
80 Wakeman et al., 2012). Ancestral strand segregation has also been tested in *C. crescentus*  
81 (Marczynski et al., 1990; Osley and Newton, 1974) and *B. subtilis* (Errington and Wake,  
82 1991), however, none of these studies showed any segregational strand preference  
83 between daughter cells.

84 We lack a mechanistic understanding of how chromosome conformation and  
85 orientation is maintained inside a bacterial cell. It also remains unknown how progressive  
86 chromosome segregation facilitates non-random sister chromosome inheritance in an

87 otherwise apparently symmetrical organism. Here, we address these questions in *E. coli*  
88 utilizing microfluidics culturing devices combined with time-lapse imaging, high-throughput  
89 microscopy and quantitative analysis. We first demonstrate that in the absence of MukBEF,  
90 anucleate cells arise predominantly from the mother cell's new pole as a consequence of  
91 the failure to segregate newly replicated origins in a timely fashion. We show that nascent  
92 lagging strands and their templates are directed towards cell centers, a process that is  
93 required for the observed translational *L-R-L-R* segregational symmetry; and which is  
94 perturbed in the absence of MukBEF. Furthermore, we show directly that the ancestral DNA  
95 strand, inherited from previous generations, is preferentially segregated to the old cell pole  
96 dependent on both MukBEF and its partner MatP. Lack of MatP does not perturb  
97 translational *L-R-L-R* symmetry; rather it leads to flipping of chromosome orientation around  
98 the longitudinal cell axis during a cell cycle, consistent with the observed loss of ancestral  
99 strand retention at old poles. Taken together, the results explain how MukBEF axial cores  
100 and their MatP-driven depletion from the *ter* region, lead to asymmetric strand and  
101 chromosome segregation. The possible functional and evolutionary consequences of this  
102 are explored.

103

## 104 **Results**

### 105 ***In the absence of MukBEF, anucleate cells arise from the newer mother cell pole***

106 To understand how anucleate *E. coli* cells form in the absence of MukBEF, we followed  
107 successive cell cycles of  $\Delta mukB$  cells with *oriC* and *ter* (*ori1* and *ter3*, respectively) regions  
108 fluorescently labeled by FROS markers. We used a 'mother machine' microfluidics device  
109 (Uphoff, 2018; Wang et al., 2010) to follow thousands of cell generations and identify  
110 changes in chromosome organization that correlate with chromosome mis-segregation.  
111 Under these conditions,  $15.7 \pm 0.4\%$  ( $\pm$ SD) of divisions led to the formation of an anucleate  
112 daughter cell (Fig. 1A, Fig. S1).

113 In  $\Delta mukB$  cells *ori1* was often mis-localized towards the old pole at birth, rather  
114 than at midcell (Fig. 1B), as previously observed for wild type (WT) cells (Wang et al., 2006).  
115 As the cell cycle progressed, *ori1* localized preferentially towards the old cell pole, with  
116 newly replicated sister *ori1* loci frequently remaining in close proximity. In contrast, *ter3*  
117 migrated from the new-born cell pole to midcell similar to what has been previously  
118 reported (Fig. 1B)(Wang et al., 2005). ~80% of anucleate cells were generated when  
119 duplicated *ori1* loci in mother cells remained together in the region of the old pole prior to  
120 cell division (Fig. 1C). In contrast, in ~70% of mother cells where chromosome segregation  
121 was faithful, *ori1* loci were visible as separate foci (Fig. 1C). Delayed separation of newly  
122 replicated *ori1* loci could be a consequence of delayed decatenation, since the decatenase  
123 TopoIV, is no longer recruited by MukBEF to *oriC*-proximal regions (Zawadzki et al., 2015).  
124 Indeed, modest over-expression of TopoIV leads to a reduction in cohesion time of newly  
125 replicated *oriC* from ~14 min to ~5 min (Wang et al., 2008). Delayed *ori1* decatenation of  
126  $\Delta mukB$  cells might explain non-viability under fast growth conditions, while slow growth  
127 conditions allow sufficient time for chromosome decatenation and segregation in most cells.  
128 In anucleate cell divisions, daughter cells that inherited two chromosomes divided normally  
129 after a modest increase in generation time (Fig. S1). However, the probability of these cells

130 forming an anucleate cell in subsequent division was  $9.1 \pm 2\%$  ( $\pm$ SD), significantly lower than  
131 for cells born with a single chromosome.

132 Prior to anucleate cell formation, mother cells divided nearly symmetrically ( $2.1 \pm 0.2$   
133  $\mu\text{m}$  and  $2.4 \pm 0.2 \mu\text{m}$ , respectively ( $\pm$ SD); two-sample t-test p-value 0.17), with the divisome  
134 being placed close to midcell. While the average anucleate cell length at birth did not  
135 significantly differ from that of the sister, the growing sister was systematically longer than  
136 the anucleate sister at birth (Fig. S1), the bias for the longer growing sister increasing with  
137 mother cell division size. Importantly, we showed that anucleate cells formed preferentially  
138 at the newer mother cell pole ( $74.4 \pm 1.8\%$  ( $\pm$ SD), Fig. 1D). Therefore, anucleate cell  
139 formation is associated with the nucleoid being preferentially retained at the old pole of  
140  $\Delta\text{mukB}$  mother cells, while in the case of WT cells the nucleoid is localized closer to the  
141 newer pole of the dividing cell (Fisher et al., 2013). We conclude that mis-localization of *ori1*  
142 towards the old pole, accompanied by delayed segregation of newly replicated *ori1* loci,  
143 directs the formation of anucleate cells to the mother cell's new pole.

144

### 145 ***MukBEF and MatP direct left-oriC-right chromosome organization***

146 Next we investigated how MukBEF orchestrates chromosome organization and segregation  
147 in growing cells. MukBEF and MatP have been proposed to be major factors in dictating *left-*  
148 *oriC-right* (L-R) chromosome organization in *E. coli* (Mäkelä and Sherratt, 2020; Wang et al.,  
149 2006). MukBEF complexes form axial cores that linearly organize the chromosome outside  
150 the 800 kb *ter* region, from where MatP bound to *matS* sites displaces MukBEF (Fig.  
151 2A)(Mäkelä and Sherratt, 2020). Complete axial cores were most easily visualized in cells in  
152 which MukBEF occupancy on the chromosome was increased  $\sim 3.5$ -fold, while cells with WT  
153 MukBEF abundance on chromosomes exhibited more granular structures (Mäkelä and  
154 Sherratt, 2020). To characterize how MukBEF axial cores influence chromosome  
155 organization during the cell cycle, we used strains that allowed us to test the requirements  
156 for *left* and *right* chromosome arm organization in relation to *oriC* and *ter* in MatP<sup>+</sup> and  
157  $\Delta\text{matP}$  cells with WT levels of MukBEF, and in  $\Delta\text{mukB}$  cells (Fig. 2). The *left* and *right*  
158 chromosome arms were labeled at *L3* and *R3* ( $-128^\circ$  and  $122^\circ$  from *oriC*, respectively) with  
159 FROS markers, as were *ori1* and *ter3* loci (Fig. 2A, B).

160 New-born WT cells exhibited the distinctive *left-oriC-right* (L3-R3) chromosome  
161 organization (Fig. 2C, D and E, Fig. S2), where *oriC* remained at the cell center and the  
162 chromosome arms (*L3* and *R3*) resided in opposite cell halves ( $97.8 \pm 0.6\%$  ( $\pm$ SD), Fig. 2F and  
163 G) (Nielsen et al., 2006; Wang et al., 2006). During replication-segregation, the pattern was  
164 extended into a translationally symmetric *left-oriC-right-left-oriC-right* (L3-R3-L3-R3) pattern  
165 in  $73.1 \pm 3.9\%$  ( $\pm$ SD) of WT cells (Fig. 2G). In the absence of MukBEF, we expected  
166 chromosome organization to be more 'relaxed' as lengthwise chromosome compaction is  
167 relieved (Mäkelä and Sherratt, 2020). Indeed, the localization of all four chromosomal  
168 markers was less precise, with a wide distribution of *L3-R3* distances (Fig. 2F), fewer *L3* and  
169 *R3* foci localized in opposite cell halves ( $56.6 \pm 3.2\%$  ( $\pm$ SD), Fig. 2G), and a random chance of  
170 observing the *L3-R3-L3-R3* organization ( $47.7 \pm 0.2\%$  ( $\pm$ SD)), versus *L3-R3-R3-L3* or *R3-L3-L3-*  
171 *R3*. The impaired chromosome organization in  $\Delta\text{mukB}$  cells is frequently accompanied by  
172 the chromosome arms being aligned together along the long cell axis with *ori1* towards the

173 old cell pole (Fig. 2B and D)(Danilova et al., 2007), an organization reminiscent of the  
174 situation in wild-type *C. crescentus* (Wang et al., 2013). We conclude that absence of  
175 lengthwise compaction by MukBEF axial cores causes loss of both the distinctive *L-R*  
176 chromosome organization prior to replication and the *L-R-L-R* organization after replication.

177 Absence of MatP leads to the formation of circular MukBEF axial cores, rather than  
178 linear ones (Fig. 2A). We observed that  $\Delta matP$  cells exhibited chromosome locus localization  
179 patterns strikingly different from that of WT and  $\Delta mukB$  cells (Fig. 2 C and E). The average  
180 distance between *L3* and *R3* was reduced two-fold (Fig. 2F), consistent with MukBEF-  
181 mediated lengthwise compaction of *ter* in the absence of MatP (Mäkelä and Sherratt, 2020).  
182 Lengthwise compaction of *ter* reduced the efficiency of *L3* and *R3* being directed into  
183 opposite cell halves ( $65.7 \pm 0.8\%$  ( $\pm SD$ ), Fig. 2G). Concomitantly, it also led to *L3* and *R3* foci  
184 being preferentially localized closer to the cell center than in WT cells where *L3* and *R3*  
185 localize towards the cell poles (Fig. 2E). Surprisingly, despite these substantial perturbations,  
186 the normal *L3-R3-L3-R3* organization was retained in  $\Delta matP$  cells prior to cell division ( $80.2 \pm$   
187  $1.9\%$  ( $\pm SD$ )).

188 Because the circular MukBEF axial cores of  $\Delta matP$  cells lead to rotational  
189 chromosome symmetry (Mäkelä and Sherratt, 2020), we hypothesized that non-replicating  
190 chromosomes in new born cells are free to rotate around the longitudinal axis of the cell.  
191 This would switch the configuration from *L3-R3* to *R3-L3* (or *vice versa*); while bi-lobed  
192 replication intermediates could prevent the rotation as replication progresses. To test this  
193 hypothesis, we followed  $\Delta matP$  cells under the microscope to observe how often the *L3-R3-*  
194 *L3-R3* orientation flips to *R3-L3-R3-L3* (or *vice versa*) in consecutive generations (Fig. S2).  
195 Indeed,  $\Delta matP$  cells retained the chromosome orientation only in  $32.2 \pm 4.6\%$  ( $\pm SD$ ) of  
196 daughter cells, while WT cells predominantly retained the orientation ( $91.4 \pm 5.2\%$  ( $\pm SD$ ),  
197 Fig. 2H). The  $\Delta matP$  daughter cells with flipped chromosome orientation were initially born  
198 with the same orientation as in the mother cell ( $88.4 \pm 2.8\%$  ( $\pm SD$ ), Fig. S2E), indicating that  
199 the chromosome rotation generally occurs after division but prior to duplication of the  
200 chromosome. We propose that the *L3-R3-L3-R3* organization arises from an interplay  
201 between bidirectional replication and the action of MukBEF axial cores.

202

### 203 ***DnaN marks lagging strand segregation to the cell center***

204 Translational symmetry of sister chromosomes arises at least in part during DNA replication  
205 from the symmetric segregation of lagging strands towards midcell (and leading strands  
206 towards the cell poles), as shown using an elegant genetic system (White et al., 2008). Here,  
207 we sought directly to visualise the positioning of lagging strands in WT,  $\Delta matP$  and  $\Delta mukB$   
208 cells.

209 During replication,  $\sim 40$  DNA-bound  $\beta_2$ -clamps, which ensure DNA polymerase III  
210 processivity, have a  $\sim 3$  min residence time on DNA before they are unloaded (Moolman et  
211 al., 2014). The DNA-bound clamps are expected to accumulate largely on the lagging strand  
212 and its template because new clamps are loaded during synthesis of each Okazaki fragment  
213 (Fig. 3A). We reasoned that since  $\beta_2$ -clamps could potentially cover  $>100$ kb of newly  
214 replicated lagging strand DNA, they could serve as a marker to monitor lagging strand  
215 segregation (Fig. 3B). As a reference, for the localization of replication forks, we imaged

216 fluorescent DNA polymerase III  $\epsilon$ -subunits (DnaQ). Indeed, while DnaQ foci were more  
217 spread towards cell poles as previously described (Reyes-Lamothe et al., 2008), DnaN foci  
218 localized closer to the cell center cell center, consistent with the lagging strands being  
219 directed to the cell center (Fig. 3C). By directly measuring the distance from each DnaQ  
220 focus to the closest DnaN focus, we found that  $41.2 \pm 5\%$  ( $\pm$ SD) of DnaQ foci do not  
221 colocalize with DnaN foci during replication (Fig. 3D). Differential location of bulk DnaN and  
222 replication forks was confirmed by measurement of the distances from replicative helicase  
223 (DnaB) foci to their closest DnaN focus ( $47.1 \pm 6.1\%$  ( $\pm$ SD) not colocalizing) (Fig. S3B, C).  
224 Since DnaN and DnaQ colocalize during early and late replication, when sister replisomes  
225 are necessarily close together, we also analysed the localization patterns in mid-replication  
226 cycle (Fig. 3E), when independently tracking replication forks are more frequently spatially  
227 separate. The pattern of DnaQ foci that did not colocalize with DnaN foci (Fig. S3F)  
228 underlines the conclusion that spatially separate sister replisomes in opposite cell halves  
229 have a different cellular location from DnaN. Our results are consistent with previous  
230 independent measurements of DnaQ and DnaN localization, and the observation that DnaN  
231 foci of sister replisomes often do not spatially separate (Mangiameli et al., 2017; Reyes-  
232 Lamothe et al., 2008; Wallden et al., 2016). Here we provide the first direct evidence that  
233 the replisome and  $\beta_2$ -clamps frequently do not colocalize during replication.

234 Our direct visualization of the segregation of lagging strands during replication,  
235 supports the previously shown symmetric segregation of leading strands towards the cell  
236 poles (White et al., 2008). To analyze how MukBEF and MatP contribute to lagging strand  
237 segregation, we measured DnaN localization in  $\Delta matP$  and  $\Delta mukB$  cells. The DnaN  
238 distribution in  $\Delta matP$  cells was much broader than in WT cells (Fig. 3E and F), indicative of  
239 spatially less precise lagging strand segregation, but still directed towards cell centers, as  
240 predicted by the *L3-R3-L3-R3* organization. The DnaQ distribution in mid-cycle  $\Delta matP$  cells  
241 was more central than that of DnaN ( $50.8 \pm 1.3\%$  ( $\pm$ SD) colocalization with DnaN, Fig. 3E),  
242 most likely because of less separated chromosome arms. Both DnaQ and DnaN exhibited a  
243 broader distribution at shorter cell lengths (Fig. 3F), presumably because of a more random  
244 chromosome conformation (Fig. 2).  $\Delta mukB$  cells showed a bimodal distribution of DnaN and  
245 DnaQ localizations towards cell poles, with almost identical patterns for both markers (Fig.  
246 3G). This shows that lagging strands and their templates cannot be directed to cell centers in  
247 a timely manner in the absence of MukBEF function, a result consistent with impaired *L-R*  
248 and *L-R-L-R* organization in  $\Delta mukB$  cells. By measuring the distance from each DnaQ focus to  
249 the closest DnaN focus, we found that lagging strands did not leave the vicinity of the  
250 replisome during the DnaN dwell time on chromosomes of  $\sim 3$  min ( $78.4 \pm 0.5\%$  ( $\pm$ SD) of foci;  
251 Fig. S3G). We hypothesize that this is a consequence of delayed decatenation by TopoIV in  
252 the absence of MukBEF (Zawadzki et al., 2015), since lagging strand templates can only be  
253 segregated from the leading strands once decatenation has occurred.

254 Finally, a dynamin-like protein CrfC (aka YjdA) has been proposed to bind  $\beta_2$ -clamps  
255 and tether the nascent strands of sister-chromosomes together (Ozaki et al., 2013).  
256 However, upon deletion of *crfC*, we observed no changes to DnaN localization along the  
257 long cell axis, or any decrease in the frequency of the *L3-R3-L3-R3* configuration (Fig. S3G,  
258 H). This result indicates that CrfC is not necessary for WT chromosome conformation and  
259 segregation.

260

261 ***Ancestral DNA strands are preferentially retained at older cell poles***

262 Previously it has been hypothesized that a symmetrical segregation of lagging strands to the  
263 cell center leads to sister chromosomes' translational symmetry and, in consequence, the  
264 ancestral ('immortal') template DNA strand is not randomly segregated to daughter cells  
265 over subsequent generations but preferentially retained in the daughter with the older cell  
266 pole (discussed in (Toro and Shapiro, 2010)). Cell division generates two new cell poles at  
267 the division septum, while the other ends of the daughter cells are the older poles that were  
268 created in an earlier division. To address this theory directly, we have developed a novel  
269 pulse-chase assay. It allowed us to visualize relative age of DNA strands between sister  
270 chromosomes and relate their position to the age of the pole without the need for cell  
271 synchronization or tracking (Fig. 4A).

272 The assay comprises pulse labelling of newly replicated DNA and identifying relative  
273 pole age by chemoreceptor accumulation at cell poles. The newly synthesized DNA was  
274 labelled by a 15 min EdU (5-Ethynyl-2'-deoxyuridine) pulse, after which cells were washed,  
275 and allowed to grow for 3 h (generation time ~150 min). To avoid EdU-mediated growth  
276 defects, thymidine was added to the medium to outcompete EdU. We observed no  
277 detrimental effects on growth rate or cell size from the low concentration of EdU used in  
278 the pulse (Fig. S4). After the growth period, which was longer than a single generation time,  
279 most cells have completed an additional round of replication resulting in only one of the  
280 two sister chromosomes remaining EdU-labelled (Fig. 4A). Cells were fixed and EdU was  
281 visualized by click-chemistry using Alexa 488 azide. In cells with segregated chromosomes  
282 just before division, the chromosome with new strand was fluorescently labeled, while the  
283 one with the ancestral strand was not.

284 To identify the older cell pole, we exploited the fact that the serine chemoreceptor,  
285 Tsr, accumulates approximately linearly with time at the cell poles (Ping et al., 2008). Hence  
286 the older pole can be distinguished from the new pole by a higher quantity of fluorescently  
287 labeled Tsr. Because imaging the Tsr-GFP fusion used before (Ping et al. 2008) was  
288 incompatible with EdU staining, we devised an alternative labeling method. To this end, a  
289 functional HaloTag fusion of the endogenous *tsr* gene was labeled with synthetic TMR dye  
290 (Fig. 4B). Furthermore, nucleoids were stained by DAPI. This allowed us to determine if the  
291 older strand chromosome was segregated towards the older or newer pole in each cell (Fig.  
292 4C). We limited analysis only to cells with segregated chromosomes (i.e. two visibly separate  
293 nucleoid regions) only one of which displayed EdU fluorescence. Note that this does not bias  
294 the analysis towards a specific pole. In a control experiment we confirmed that the intensity  
295 of Tsr-mYpet foci was higher at the older pole in  $99.2 \pm 0.5\%$  ( $\pm$ SD) of cells.

296 We observed that  $71.3 \pm 3.9\%$  ( $\pm$ SD) of WT cells contained EdU foci in the  
297 chromosome closer to the new pole (Fig. 5A). Because EdU was incorporated into the new  
298 template strand, this indicates that the ancestral strand is preferentially retained at the  
299 older pole. The result deviates significantly from random retention, where the older pole  
300 would have a 50% chance of inheriting either strand (binomial two-tailed test p-value  $< 10^{-5}$ ).  
301 We also compared the dispersion (SD) of our data to a binomial distribution with  
302 different sample sizes to estimate reliability of our experiment (Fig. 5B). We found excellent

303 agreement showing that our measurements are robust for the given sample size, with no  
304 additional noise sources, and increasing data sample size would give diminishing returns.

305 How is ancestral strand retention related to chromosome organization? To address  
306 this question, we tested the contributions of MukBEF and MatP to ancestral strand  
307 retention. Upon deletion of *mukB*, we observed a random segregation of the ancestral  
308 strand ( $48.5 \pm 3.8\%$  ( $\pm$ SD), Fig. 5A), demonstrating that functional MukBEF is required for  
309 ancestral strand retention at older poles. Deletion of *matP* also abolished the preferential  
310 segregation of the ancestral strand ( $46.2 \pm 1.1\%$  ( $\pm$ SD), Fig. 5A). While MatP has not been  
311 implicated in early chromosome segregation, when the segregation pattern(s) emerge, the  
312 influence of MatP on MukBEF action is crucial as it prevents longitudinal chromosome  
313 rotation (Fig. 2H), which would disrupt the association of the ancestral strand with the older  
314 pole. MatP-*matS* also interacts with the divisome through ZapB and this interaction has  
315 been proposed to partially anchor *ter* to the inner cell membrane (Espéli et al., 2012). This  
316 interaction could plausibly contribute to the ancestral strand retention by anchoring the  
317 chromosome and thereby preventing chromosome rotation. However, upon replacing the  
318 native *matP* with a non-divisome interacting *matP* $\Delta$ C20 mutant or deleting *zapB*, we did not  
319 observe any difference to WT with regard to ancestral strand retention ( $71.0 \pm 3.1\%$  and  
320  $71.8 \pm 1.0\%$ , respectively ( $\pm$ SD); Fig. 5A). This confirms that the loss of ancestral strand  
321 retention in  $\Delta$ *matP* cells is related to the proposed longitudinal rotation of the chromosome  
322 over generations.

323 Finally, since MukBEF and MatP have co-evolved with a group of proteins (including  
324 Dam and SeqA) that are related to Dam DNA methyltransferase activity (Brézellec et al.,  
325 2006), we tested the influence of these proteins on the retention of the ancestral strand.  
326 Dam methylates adenines in the sequence GATC, which transiently distinguishes strands  
327 after replication because of delayed methylation of the newly replicated strands. Prior to  
328 Dam methylation, SeqA binds to hemimethylated GATC sites, negatively regulating  
329 replication initiation and possibly contributing to chromosome segregation (reviewed in  
330 (Waldminghaus and Skarstad, 2009)). Deletion of either *dam* or *seqA* did not influence  
331 ancestral strand retention at older poles ( $69.9 \pm 1.5\%$  and  $67.6 \pm 3.3\%$ , respectively ( $\pm$ SD);  
332 Fig. 5A), indicating GATC methylation patterns do not affect the observed asymmetry and  
333 consequently, overall *L-R* chromosome organization.

334

## 335 Discussion

336 Our results demonstrate how MukBEF axial cores direct nucleoid organization and non-  
337 random segregation of sister chromosomes in *E. coli*. This work extends that describing  
338 chromosome organization by MukBEF axial cores (Mäkelä and Sherratt, 2020), and uncovers  
339 important principles of nucleoid organization and replication-segregation, as illustrated in  
340 Fig. 6 and outlined below.

341

- 342 1. MukBEF axial cores, linearized by *matS*-MatP-mediated depletion of MukBEF from  
343 *ter*, are required for *left-oriC-right* chromosome locus organization along the long  
344 cell axis.



- 345 2. The linearity of axial cores prevents longitudinal nucleoid rotation, thereby retaining  
346 the *left-oriC-right* chromosome orientation over generations.
- 347 3. Translational symmetry of the sister chromosomes results from the axial core  
348 structures together with the segregation of lagging strands towards the cell center.
- 349 4. The ancestral DNA strand is preferentially segregated to the older pole cell over  
350 generations, a process dependent on MukBEF and MatP.
- 351 5. Absence of MukBEF leads to anucleate cell formation predominantly at the newer  
352 mother cell pole, largely because of failure to segregate newly replicated origins  
353 from the vicinity of the older pole.

354

355 Our analyses provide molecular mechanisms underlying the *E. coli* chromosome  
356 organization and segregation, and complement previous studies that have rigorously  
357 quantified the nucleoid dynamics in mechanical terms (Cass et al., 2016; Fisher et al., 2013;  
358 Fritsche et al., 2012). The model succinctly explains previous observations and provide a  
359 conceptual foundation for understanding how nucleoid conformation and dynamics shape  
360 the subcellular organization.

361

### 362 ***E. coli* chromosome organization**

363 Stiff nucleoid ‘bundles’ that are radially confined by cell dimensions and exhibit a contour  
364 length of the scale of cell dimensions were characterized in live-imaging studies of WT *E. coli*  
365 (Fisher et al., 2013). Bundles were also identified in cells with increased volume, which  
366 allowed visualisation of non-replicating toroidal chromosomes (Wu et al., 2019). We  
367 propose that MukBEF axial cores correspond to these bundles; the duality of the bundles  
368 observed in WT cells likely relate to the bimodal nature of axial cores in non-replicating  
369 MatP<sup>+</sup> cells. We hypothesize that individual dimer of dimer MukBEF complexes within axial  
370 cores form DNA loops using energy from ATP, most likely through progressive loop  
371 enlargement (Davidson et al., 2019; Ganji et al., 2018; Goloborodko et al., 2016). Unloading  
372 and re-loading of MukBEF complexes will impact nucleoid spatio-temporal dynamics and  
373 could be dependent on intra-chromosomal stress (Fisher et al., 2013). The correlative  
374 timescale of bundle dynamics is of the order of a minute, similar to the dwell time of  
375 individual MukBEF complexes on the chromosome (Badrinarayanan et al., 2012; Fisher et  
376 al., 2013; Mäkelä and Sherratt, 2020). MukBEF forms a linear axial core to the chromosome  
377 by compacting it lengthwise outside of *ter*, where *matS* bound MatP displaces MukBEF  
378 (Mäkelä and Sherratt, 2020). The absence of MatP leads to formation of circular symmetric  
379 MukBEF axial cores. Theoretical studies concluded that lengthwise compaction of the  
380 chromosome (by MukBEF) would maintain the linear organization and forms rigid  
381 chromosome bundles (Marko and Siggia, 1997). We propose that the linearity of the axial  
382 core reduces the dimensions of free chromosome movement, thereby preventing  
383 longitudinal chromosome rotation and therefore explaining how chromosome loci can be  
384 robustly positioned along the long cell axis in a colinear manner outside of *ter* (Fig. 6).

385 Previous attempts to explain chromosome locus positioning by a randomly oriented  
386 polymer, or by transcription factor-mediated DNA loops fail to explain nucleoid organization  
387 in  $\Delta mukB$  or  $\Delta matP$  cells (Fritsche et al., 2012; Jun and Mulder, 2006). The presence of

388 MukBEF axial cores explains how loss of a flexible *ter* region in the absence of MatP results  
389 in chromosome arms being closer together, as shown here. A flexible *ter* region might be  
390 required for efficient chromosome segregation during fast growth as  $\Delta matP$  cells exhibit  
391 more frequent anucleate cell production than MatP<sup>+</sup> cells (Mercier et al., 2008). Broadly, we  
392 propose that the rigid linear axial core removes the requirement for membrane anchoring  
393 to orient and/or position the chromosome. Membrane tethering is generally found in  
394 organisms in which MukBEF has been replaced by Smc-ScpAB complexes and which carry a  
395 *parABS* segregation system; e.g. through PopZ in *C. crescentus* (Ebersbach et al., 2008),  
396 HubP in *V. cholera* (Yamaichi et al., 2012), and RacA/DivIVA in sporulating *B. subtilis* (Ben-  
397 Yehuda et al., 2003; Wu and Errington, 2003). Membrane anchoring typically uses ParB  
398 bound to *oriC*-proximal *parS* sites as an intermediary. Intriguingly, some bacteria, such as *V.*  
399 *cholera* or *P. aeruginosa*, not only encode MukBEF/MksBEF, but also specify a *parABS*  
400 system (David et al., 2014; Vallet-Gely and Bocard, 2013). Whether organisms that encode  
401 MukBEF orthologs, but not typical Smc-ScpAB complexes, and which lack ParABS systems,  
402 generally have life cycles that encompass overlapping replication cycles, similar to *E. coli*,  
403 remains to be determined.

404

#### 405 ***Sister chromosome replication and segregation***

406 Chromosome organization specified by the MukBEF axial core directs the translational  
407 symmetric (*L-R-L-R*) segregation of sister chromosomes during replication (Fig. 6), which  
408 alone is insufficient for this organization (Fig. 6). Lengthwise compaction of newly replicated  
409 DNA promotes individualization of sister chromosomes through excluded volume  
410 interactions and by maximization of conformational entropy that leads to repulsion  
411 between sister chromosomes (Goloborodko et al., 2016; Marko and Siggia, 1997). The  
412 presence of the *L-R-L-R* segregation pattern of sister chromosomes in both WT and  $\Delta matP$   
413 cells indicates that the pre-replication organization of the chromosome, where chromosome  
414 arms are directed into separate cell halves only in WT cells, is not required for establishing  
415 this pattern. While symmetrically lengthwise compacted chromosomes in  $\Delta matP$  cells (Fig.  
416 2A)(Mäkelä and Sherratt, 2020) are prone to change *L-R* orientation in non-replicating cells,  
417 bi-loped replication intermediates prevent rotation during late replication (Fig. 6).

418 The relationship between *L-R-L-R* chromosome organization and symmetrical  
419 segregation of leading/lagging strands has been discussed previously in relation to the  
420 observed leading strand spatial segregation pattern (Toro and Shapiro, 2010; White et al.,  
421 2008). Consistent with this, we observed accumulation of  $\beta_2$ -clamps, present primarily on  
422 lagging strands, towards cell centers of replicating cells, when compared to both DNA  
423 polymerase III and helicase localization. Differential positioning of the replisome and  $\beta_2$   
424 clamps resolves the conundrum that emerged from studies that favoured a model of a  
425 single replication 'factory' containing two replisomes at cell center, based on clamp labelling  
426 (Mangiameli et al., 2017). The results support the model of independent tracking of the two  
427 often spatially separated replisomes in cells undergoing a single round of replication  
428 (Japaridze et al., 2020; Reyes-Lamothe et al., 2008) although segregation forces along with  
429 the reorganisation of parental and newly replicated DNA leads to frequent movement of  
430 sister replisomes towards cell center. A dynamin-like protein YjdA (aka CrfC), a possible

431 candidate for directing  $\beta_2$ -clamps to the cell centre, was not required for this action.  
432 Because clamp localization at the cell center is dependent on the formation of linear axial  
433 cores, we hypothesize that MukBEF could plausibly differentiate the strands, e.g. leaving  
434 lagging strands less compacted (Fig. 6). However, the different contributions of MukBEF  
435 activity to chromosome organization and segregation are difficult to delineate, as in the  
436 absence of MukBEF, cohesion time is increased and *L-R* organization prior to replication is  
437 impaired (Fig. 1).

438 Our results also show that the lifetime of individual chromosome-associated clamps  
439 (estimated to be  $\sim 3$  min (Moolman et al., 2014)) must be longer than the daughter  
440 chromosome cohesion time for chromosomal regions outside of *oriC* and *ter* (estimated  $\sim 14$   
441 min and  $\sim 9$  min, respectively) (Nolivos et al., 2016; Wang et al., 2008). Cohesion time is  
442 largely determined by the time required for TopoIV to remove replicative catenanes  
443 (Nolivos et al., 2016; Wang et al., 2008; Zawadzki et al., 2015). In addition, slower *oriC*  
444 segregation may additionally require accumulation of sufficient newly replicated DNA that  
445 leads to abrupt separation of newly replicated sister chromosomes (Cass et al., 2016; Fisher  
446 et al., 2013). Cohesion time is influenced by the absence of MukBEF, which promotes  
447 TopoIV activity (Nolivos et al., 2016; Zawadzki et al., 2015), although tethering of *ter* to the  
448 divisome through MatP-ZapB interactions may also influence cohesion time in this region  
449 (Monterroso et al., 2019). Precise measurements of cohesion times for the rest of the  
450 chromosome have been refractory to precise experimental determination.

451

#### 452 ***Ancestral strand retention at the older pole***

453 We have directly shown preferential retention of the ancestral DNA strand at the older pole  
454 in *E. coli*. This non-random segregation is determined by the translational symmetry of the  
455 sister chromosomes (*L-R-L-R*), along with efficient maintenance of chromosome orientation  
456 over generations. Intriguingly, in the absence of MukBEF, preferential strand retention is  
457 lost and chromosomes adopt a longitudinal *oriC-ter* chromosome organization with co-  
458 aligned chromosome arms along the long cell axis, similar to *C. crescentus* and sporulating *B.*  
459 *subtilis*. However, as *E. coli* lacks the properties of cell differentiation, development and  
460 regeneration of a multicellular organism, it is not clear why it has evolved a chromosome  
461 organization that preferentially segregates the ancestral DNA strand to the cell with the  
462 older pole. *E. coli* older pole containing cells exhibit a constant growth rate for hundreds of  
463 generations (Wang et al., 2010). However, the death rate was found to increase with  
464 replicative cell age, which was attributed to growth-independent accumulation of protein  
465 damage (Wang et al., 2010). Increasing cellular maintenance processes through the general  
466 stress response reduced the death rate while its absence increased it (Yang et al., 2019). The  
467 older pole accumulates more membrane proteins (e.g. chemoreceptors, efflux pumps) than  
468 the new pole and in fluctuating or poor environment, these can significantly contribute to  
469 cell growth (Bergmiller et al., 2017; Ping et al., 2008). For example, the main multidrug  
470 efflux pump of *E. coli*, AcrAB-TolC, exhibits a partitioning bias for the older cell poles  
471 (Bergmiller et al., 2017). Consequently, older pole cells display increased efflux activity  
472 relative to new cell pole daughters giving the older pole cell a growth advantage under  
473 subinhibitory antibiotic concentrations and possibly protection against other toxic

474 compounds. Notably, AcrAB-TolC pump activity is also required for acquiring a resistance  
475 gene from mobile genetic elements in the presence of antibiotics, as it reduces antibiotic  
476 concentrations inside the cell (Nolivos et al., 2019). A common epigenetic mechanism to  
477 regulate phase variation in bacteria involves formation of DNA methylation patterns by  
478 proteins binding near a hemimethylated GATC site, and blocking methylation, e.g. *pap* or  
479 *foo*, *clp*, and *pef* systems, which all encode pili (Casadesús and Low, 2013). Preferential  
480 retention of the old strand at the old pole could potentially cause the old pole cell to more  
481 likely to maintain the previous methylated state. We also hypothesize that ancestral strand  
482 retention at older pole cells could be beneficial to structured growth of *E. coli* in colonies  
483 where younger bacteria could progress to a new terrain while the older ones stay closer to  
484 the colony center. Finally, older strand retention could simply be an evolutionary by-product  
485 of maintaining the *left-oriC-right* chromosome organization over division cycles.  
486 Nevertheless, since ancestral strand retention occurs in only ~70% of older-pole cells, this  
487 gives opportunities for selection in fluctuating or harmful environments independent of  
488 whether older or newer pole cells thrive better.  
489

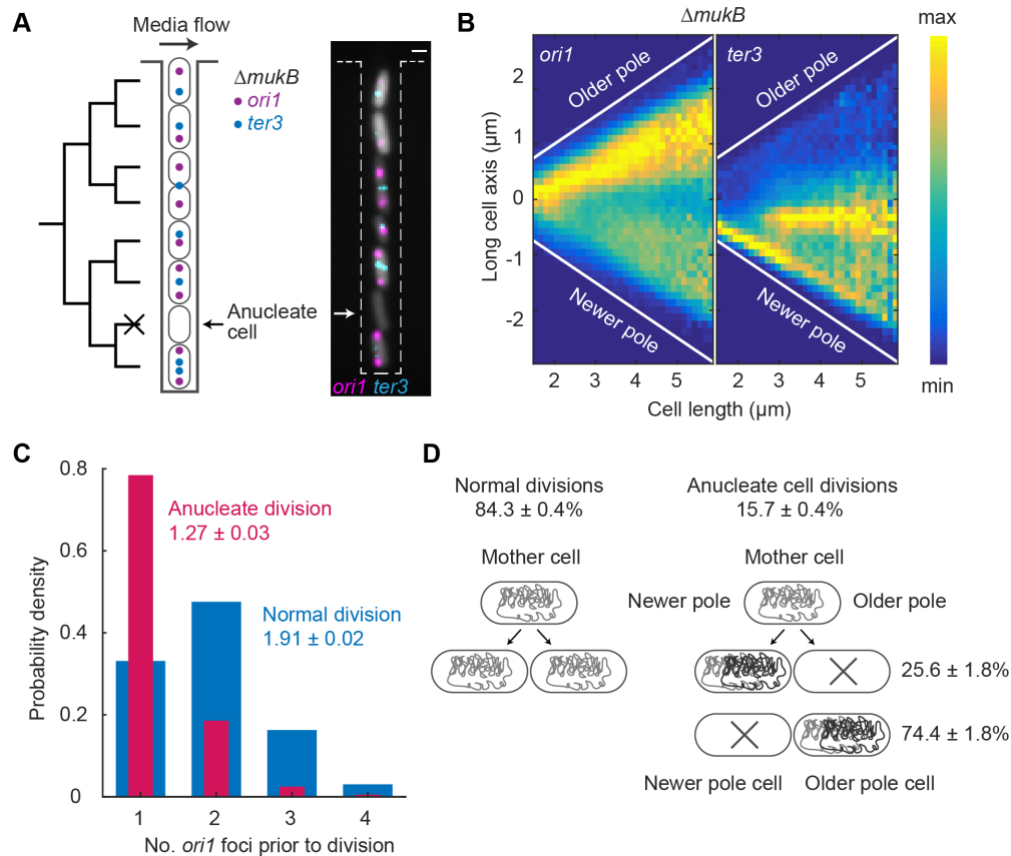

490

491

492

493

494

495

496

497

498

499

500

501

**Fig. 1. Anucleate cell formation in absence of MukB is biased towards mother cell newer poles** (A) Schematic of mother machine microfluidics device and representative cells in a channel.  $\Delta mukB$  cells contain *ori1* and *ter3* FROS markers and a segmentation marker (grey). A non-growing anucleate cell lacking FROS markers is indicated. Scale bar: 1  $\mu\text{m}$ . (B) *ori1* and *ter3* localization as a function of cell length in  $\Delta mukB$  cells. Sample numbers with different cell lengths are normalized. 221057 cells. (C) Number of *ori1* foci prior to anucleate (one of the daughters is anucleate; 2444 cells) and normal cell division (10468 cells). Two-sample t-test between mean *ori1* numbers prior to anucleate and normal division p-value  $< 10^{-5}$ . (D) Percentage of anucleate cells forming at a mother cell's old and newer poles (2269 divisions). Percentage of anucleate cell divisions also shown (14392 divisions). All data from 3 repeats.

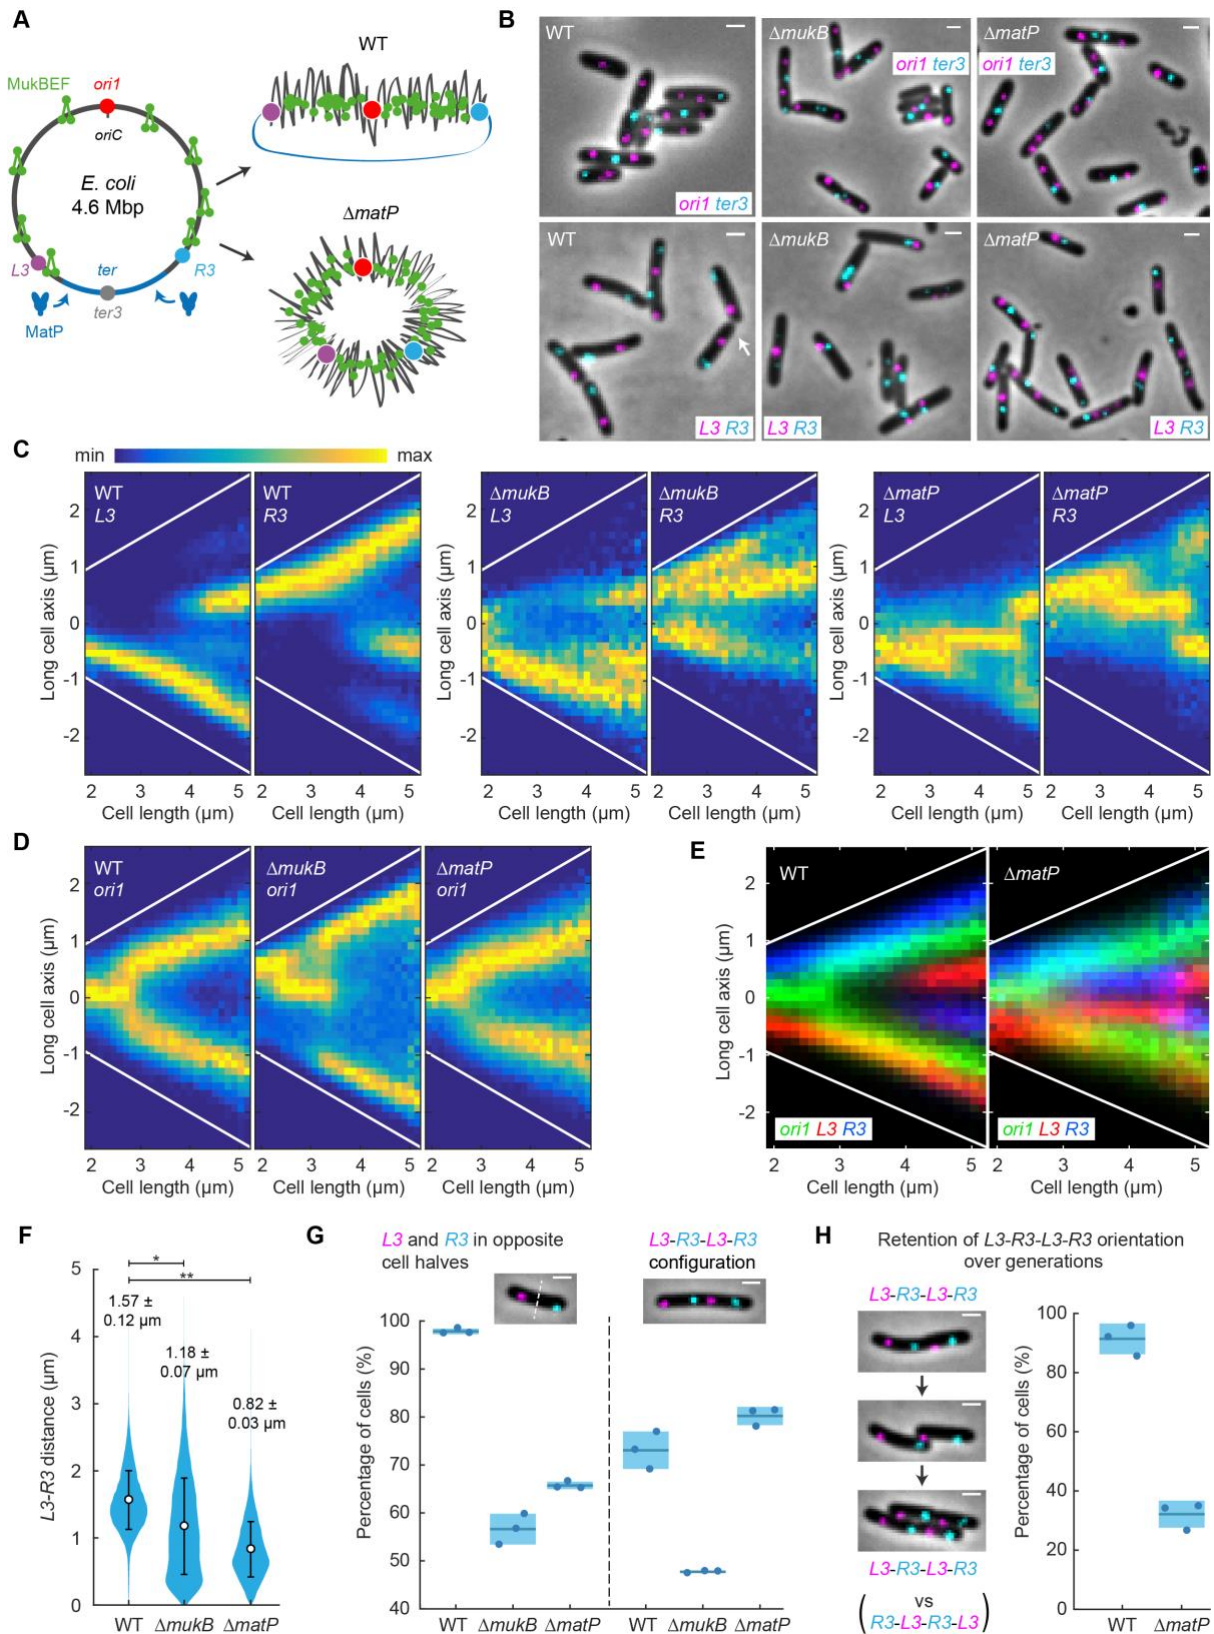

502

503 **Fig. 2. MukBEF and MatP action generates and retains *left-oriC-right E. coli* chromosome**  
 504 **organization. (A)** *E. coli* chromosome circular map with *ori1*, *ter3*, *L3*, and *R3* loci illustrates  
 505 uniform MukBEF occupancy except for 800 kbp *ter*, from which *matS* bound MatP displaces  
 506 MukBEF. A folded chromosome conformation by linear MukBEF axial cores is shown with

507 and without MatP (for more details see (Mäkelä and Sherratt, 2020)). **(B)** Representative  
508 images of WT,  $\Delta mukB$  and  $\Delta matP$  cells with *ori1* and *ter3*, or *L3* and *R3* FROS markers. Note  
509 an atypical *R3-L3-L3-R3* configuration in WT (white arrow) in comparison to standard *L3-R3-*  
510 *L3-R3*. Scale bars: 1  $\mu$ m. **(C)** *L3* and *R3* localizations and **(D)** *ori1* localizations along the long  
511 cell axis as a function of cell length in WT (*L3-R3* 57509 cells, *ori1* 42612 cells),  $\Delta mukB$  (*L3-R3*  
512 27984 cells, *ori1* 54820 cells) and  $\Delta matP$  (*L3-R3* 46679 cells, *ori1* 51350 cells). Sample  
513 numbers with different cell lengths are normalized. Cells are oriented to place *L3* more  
514 towards the negative pole (towards figure bottom) or, in the *ori1* data, *ter3* is oriented more  
515 towards the negative pole (see Fig. S2). White lines denote cell borders. **(E)** Overlay of *ori1*  
516 and *L3-R3* localization data in WT and  $\Delta matP$  from (C) and (D). **(F)** Distance between *L3* and  
517 *R3* markers in WT (47376 cells),  $\Delta mukB$  (15615 cells) and  $\Delta matP$  (41625 cells) in single *L3*  
518 and *R3* focus cells. Mean and dispersion (SD) between cells are shown for each distribution.  
519 \* and \*\* denote two-sample t-test of *L3-R3* distances between WT and  $\Delta mukB$  (p-value  
520 0.0081) and WT and  $\Delta matP$  (p-value  $5 \times 10^{-4}$ ), respectively. **(G)** (left) Percentage of cells with  
521 *L3* and *R3* in opposite cell halves in single *L3* and *R3* focus cells (WT 47376 cells,  $\Delta mukB$   
522 15615 cells,  $\Delta matP$  41625 cells). (right) Percentage of cells with *L3-R3-L3-R3* (or *R3-L3-R3-L3*)  
523 configuration (versus *L3-R3-R3-L3* or *R3-L3-L3-R3*) in double *L3* and *R3* focus cells (WT 10352  
524 cells,  $\Delta mukB$  2535 cells,  $\Delta matP$  6297 cells). Scale bars: 1  $\mu$ m. **(H)** Percentage of cells  
525 retaining *L3-R3-L3-R3* orientation (versus flipping to *R3-L3-R3-L3*) from a mother cell to a  
526 daughter cell in WT (859 pairs) and  $\Delta matP$  (1054 pairs). Scale bars: 1  $\mu$ m. Data from 3  
527 repeats of each experiment.  
528

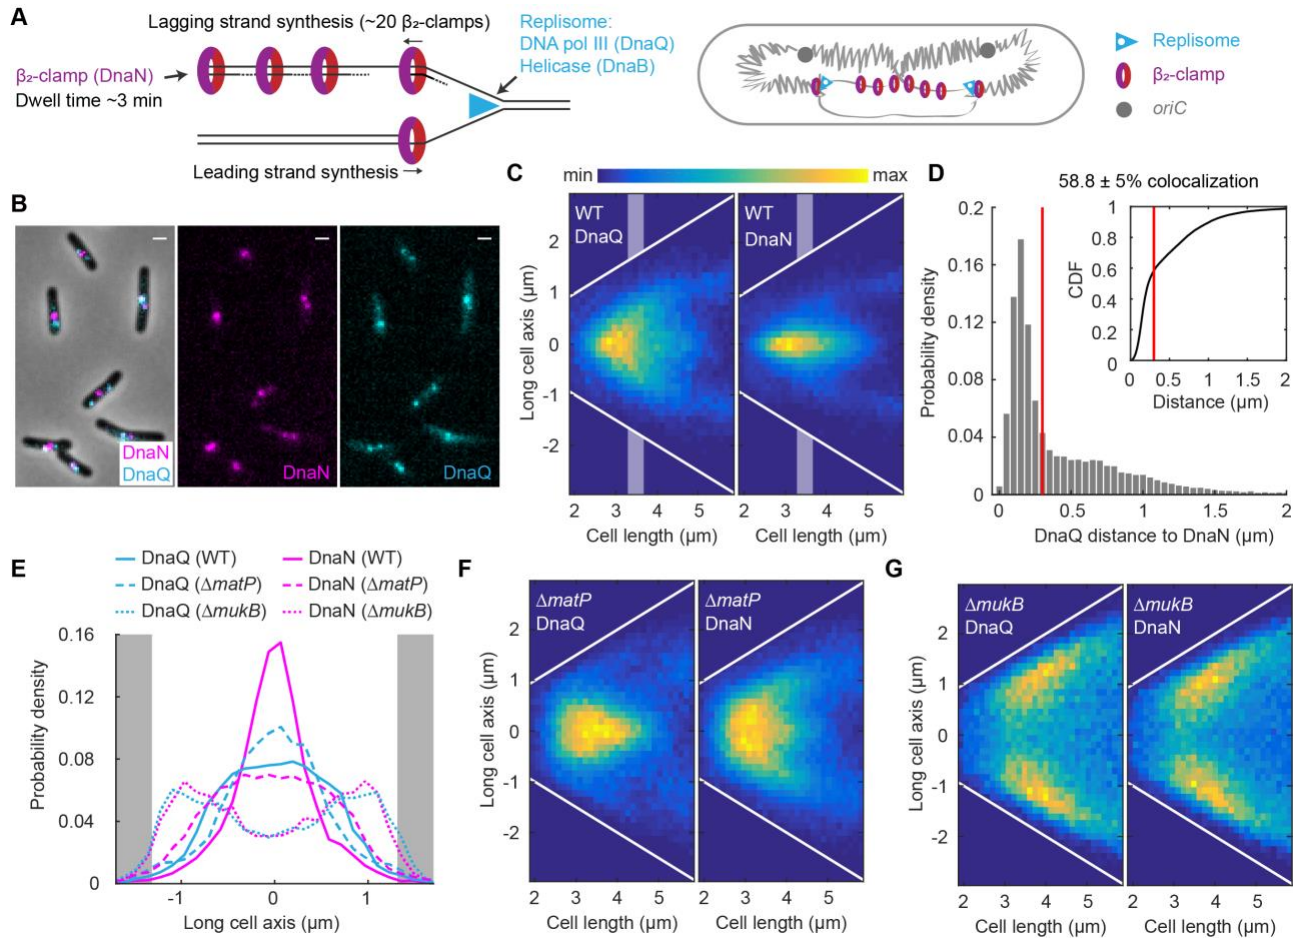

529

530 **Fig. 3. DnaN visualizes the lagging strands during replication.** (A) Schematic of  
 531 accumulation of  $\beta_2$ -clamps (DnaN) on the lagging strand and its template during replication  
 532 (Moolman et al., 2014). The DNA polymerase  $\epsilon$ -subunit (DnaQ) marks the location of the  
 533 replisome. (B) Representative images of WT cells with fluorescently labeled DnaN and DnaQ.  
 534 Scale bars: 1  $\mu$ m. (C) DnaQ and DnaN localization in WT cells as a function of cell length  
 535 (37720 cells). White lines denote cell borders. Shaded areas denote intermediate cell  
 536 lengths for localization data in (E). (D) Distance from a DnaQ focus to the closest DnaN  
 537 focus. DnaQ and DnaN colocalize in  $58.8 \pm 5\%$  ( $\pm$ SD) of focus pairs (38855 pairs) as defined  
 538 by a threshold (red lines) below which two proteins colocalize (dictated by a diffraction limit  
 539 of 300 nm). Inset shows the same data as a cumulative distribution. Same data as in (C). (E)  
 540 DnaQ or DnaN localization with intermediate cell lengths (3.3-3.7  $\mu$ m) in WT (DnaN 7104,  
 541 DnaQ 8006 spots),  $\Delta matP$  (DnaN 11925, DnaQ 8025 spots) and  $\Delta mukB$  (DnaN 5060, DnaQ  
 542 4205 spots) cells (see C, F, G). Full width at half maximum (FWHM) ( $\pm$ SD) of the distribution  
 543 in WT: DnaN  $0.67 \pm 0.06$   $\mu$ m, DnaQ  $1.67 \pm 0.08$   $\mu$ m; and in  $\Delta matP$ : DnaN  $1.85 \pm 0.04$   $\mu$ m,  
 544 DnaQ  $1.14 \pm 0.14$   $\mu$ m. Grey areas denote cell poles. (F) DnaQ and DnaN localization in  
 545  $\Delta matP$  cells (51956 cells) and in (G)  $\Delta mukB$  cells (22902 cells) as a function of cell length.  
 546 White lines denote cell borders. Data from 3 repeats in all analyses.



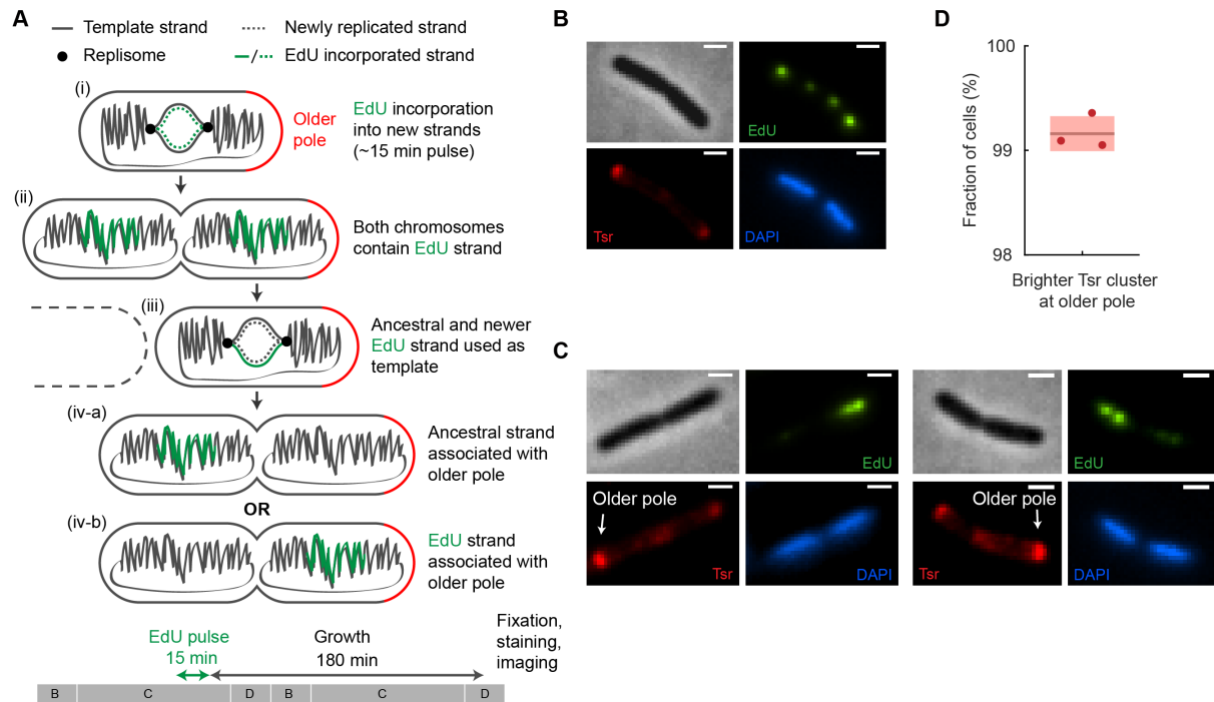

547

548 **Fig. 4. Visualization of ancestral DNA strand retention in *E. coli*.** (A) Ancestral DNA strand  
 549 propagation shown following an EdU pulse and the subsequent growth. After the 2<sup>nd</sup>  
 550 round of replication only one of the chromosomes inherits the EdU label. Note that only a part of  
 551 the chromosome is labelled with EdU. The 15 min EdU pulse and growth period are also  
 552 shown relative to a schematic of cell cycle stages (B, C and D periods, generation time ~150  
 553 min). (B) Representative EdU<sup>Alexa488</sup>, Tsr<sup>TMR</sup> and DAPI images of a cell at stage (ii) (see (A))  
 554 after the EdU pulse. Note that each chromosome has two EdU foci because pulse-labeled  
 555 chromosome arms are separated. Scale bars: 1  $\mu$ m (C) Representative EdU<sup>Alexa488</sup>, Tsr<sup>TMR</sup> and  
 556 DAPI images after the complete pulse-chase protocol (stage (iv-a), see (A)). The older pole is  
 557 indicated with an arrow. Scale bars: 1  $\mu$ m. (D) Accuracy of the older pole classification using  
 558 Tsr prior to cell division. Shaded areas denote SD. Data from 2505 cells and 3 repeats.

559

560

561

562

563

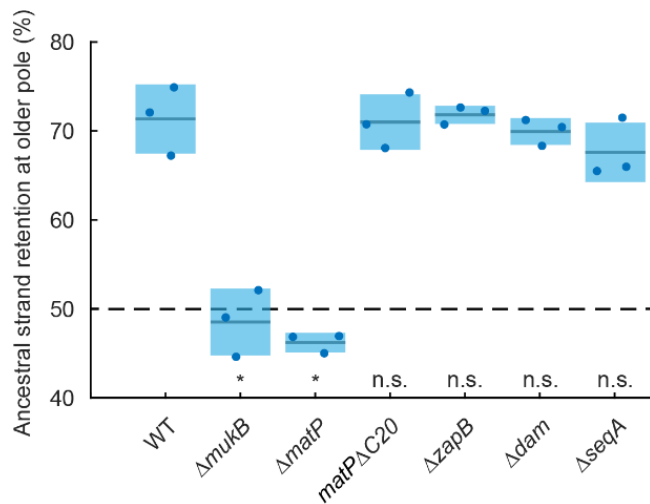

564

565 **Fig. 5. Preferential retention of the ancestral strand at older cell poles requires functional**  
566 **MukBEF and MatP.** Percentage of ancestral strands retained at the older pole in WT (988  
567 cells),  $\Delta mukB$  (427 cells),  $\Delta matP$  (1050 cells), non-divisible interacting  $matP\Delta C20$  mutant  
568 (1617 cells),  $\Delta zapB$  (969 cells),  $\Delta dam$  (717 cells) and  $\Delta seqA$  (473 cells). Dashed line shows  
569 random retention. p-value from two-proportion two-tailed z-test was used to test if  
570 binomial distributions significantly differ from WT; indicated by n.s. (> 0.01, non-significant)  
571 and \* (< 0.01, significant) (p-values <10<sup>-5</sup>, <10<sup>-5</sup>, 0.51, 0.83, 0.26, and 0.03, respectively).  
572 Shaded areas denote SD. Data from 3 repeats.

573

574

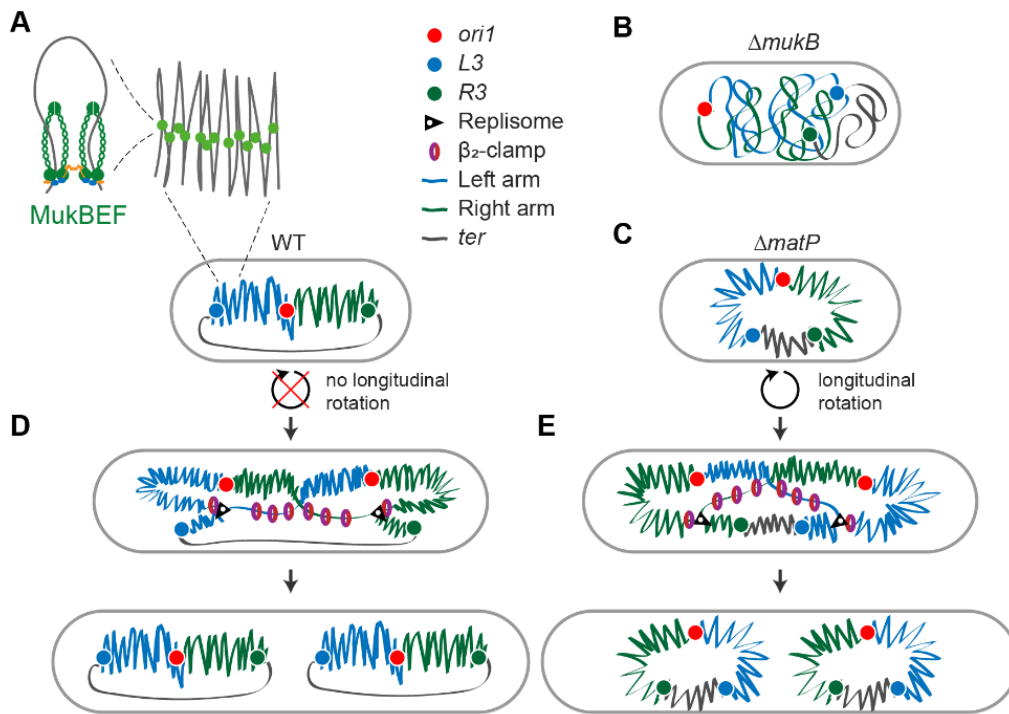

575

576 **Fig. 6. Chromosome organization and segregation by MukBEF and MatP.** (A) MukBEF dimer  
 577 of dimer complexes form DNA loops dependent on ATP hydrolysis. Ubiquitous loop  
 578 formation outside of *ter* compacts the chromosome lengthwise forming a linear axial core to  
 579 the chromosome. Axial cores form stiff linear nucleoid bundles that localize chromosomal  
 580 loci linearly along the long cell axis and maintain chromosome orientation by preventing  
 581 longitudinal cell axis rotation. (B) Absence of functional MukBEF increases the effective  
 582 contour length of chromosomes, leading to mis-localization of chromosome loci and loss of  
 583 *left-oriC-right* organization of the chromosome. (C) MukBEF forms a complete circular axial  
 584 core to the chromosome in the absence of MatP. Consequently, chromosome arms cannot  
 585 be efficiently directed to opposite cell halves, *left-oriC-right* organization in non-replicating  
 586 cells is impaired and chromosomes rotate in the longitudinal cell axis. During replication and  
 587 prior to division, WT (D) and  $\Delta matP$  cells (E) exhibit translational symmetric (*L-R-L-R*)  
 588 segregation of sister chromosomes. This is accompanied by the symmetric segregation of  
 589 lagging strands and their templates during replication, as visualized by accumulation of  $\beta_2$ -  
 590 clamps. Relative FROS marker, replisome and  $\beta_2$ -clamps localizations are derived from the  
 591 data generated here.

592

593

## 594 **Materials and Methods**

### 595 **Bacterial strains and growth conditions**

596 Bacterial strains and primers are listed in Table S1 and S2, respectively. All strains were  
597 derivatives of *E. coli* K12 AB1157 (Bachmann, 1996). *kan*, *cat*, *gen*, and *hyg* refer to insertions  
598 conferring resistance to kanamycin (Km<sup>r</sup>), chloramphenicol (Cm<sup>r</sup>), gentamycin (Gm<sup>r</sup>) and  
599 hygromycin B (Hyg<sup>r</sup>), respectively. The insertions are flanked by Flp site-specific  
600 recombination sites (*frt*) that allow removing the resistance gene using Flp recombinase from  
601 plasmid pCP20 (Datsenko and Wanner, 2000). *tsr-HaloTag-kan* and *tsr-mYpet-kan* were  
602 inserted into the native *tsr* chromosomal locus using  $\lambda$ -red recombination (Datsenko and  
603 Wanner, 2000). The generated gene loci were transferred by phage P1 transduction to  
604 AB1157 yielding strains JM122 (*tsr-HaloTag-kan*) and JM133 (*tsr-mYpet-kan*). Deletion strains  
605 of JM122 were constructed by P1 transduction, first removing the *kan* resistance gene using  
606 Flp recombinase. *L3-R3* deletion strains were constructed from RRL66 using P1 transduction.  
607 The microfluidics strain (JM09) was constructed from RRL189 by introducing  $\Delta$ *flhd-kan* and  
608  $\Delta$ *mukB-kan* by consecutive rounds of P1 transduction and Flp recombination. GFPmut2 cell  
609 marker was inserted at an *attTn7* site by a plasmid transformation as described in (McKenzie  
610 and Craig, 2006). The DnaQ and DnaN labeled strain (JM141) was constructed from RRL388  
611 using P1 transduction from RRL36. Deletion strains of JM141 were constructed by P1  
612 transduction, first removing the *kan* resistance gene using Flp recombinase. JM142 and  
613 JM143 were constructed by P1 transduction from JW4070. All genetic modifications were  
614 verified by PCR and/or sequencing and behavior in quantitative imaging. *mukB* deletions were  
615 verified by temperature-sensitivity in rich media, as described in (Nolivos et al., 2016).

616 Cells were grown in M9 minimal medium supplemented with 0.2% (v/v) glycerol, 2  $\mu$ g  
617 ml<sup>-1</sup> thiamine, and required amino acids (threonine, leucine, proline, histidine and arginine;  
618 0.1 mg ml<sup>-1</sup>) at 30 °C. For microscopy, cells were grown overnight, diluted 1000-fold and  
619 grown to an A<sub>600</sub> of ~0.1. Cells were then pelleted, spotted onto an M9 glycerol 1% (w/v)  
620 agarose pad on a slide and covered by a coverslip. In mother machine microfluidics  
621 experiments, cells were first grown in M9 minimal medium with 0.2% (v/v) glycerol at 30 °C  
622 (as above), and then placed inside the microfluidics device, when the media was changed to  
623 M9 minimal medium supplemented with 0.2% (v/v) glucose, 2  $\mu$ g ml<sup>-1</sup> thiamine, MEM amino  
624 acids (Gibco, #11130-036), 0.1 mg ml<sup>-1</sup> proline, and 0.85 mg ml<sup>-1</sup> Pluronic F127 (Sigma-Aldrich,  
625 P2443), and the temperature was set to 37 °C.

626

### 627 **EdU pulse labeling**

628 Cells grown until A<sub>600</sub> of ~0.1 were labelled with 10  $\mu$ M EdU (5-Ethynyl-2'-deoxyuridine,  
629 Thermofisher, C10337) for 15 min after which cells were washed, introduced to fresh media  
630 containing 60  $\mu$ g/ml thymidine and allowed to grow for 3 h. Following this, cells were fixed  
631 with 4% PFA (v/v) for 30 min and permeabilized with 0.5% Triton X-100 (v/v) for 30 min. EdU  
632 click-chemistry reaction was conducted following the instructions (Thermofisher, #C10337)  
633 using Alexa 488 azide in a final volume of 50  $\mu$ l for 30 min at room temperature, followed by  
634 washing. Cells were then labelled with TMR HaloTag ligand as in (Banaz et al., 2019). Briefly,  
635 cells were incubated with 2  $\mu$ M TMR ligand for 30 min and washed several times. Finally,

636 nucleoids were labelled with 1  $\mu\text{g}/\text{ml}$  DAPI for 15 min and washed, after which the cells were  
637 ready for imaging.

638

### 639 **Epifluorescence microscopy**

640 Fluorescence images were acquired on an inverted fluorescence microscope (Ti-E, Nikon)  
641 equipped with a perfect focus system, a 100 $\times$  NA 1.4 oil immersion objective, a motorized  
642 stage, an sCMOS camera (Orca Flash 4, Hamamatsu), and a temperature chamber (Okolabs).  
643 Exposure times were 300 ms for TMR, Alexa 488 and mCherry, mYpet; 150 ms for mCerulean,  
644 and 100 ms for DAPI using an LED excitation source (Lumencor SpectraX). Phase contrast  
645 images were collected for cell segmentation. Microscopy data was collected automatically  
646 from the sample area. Time-lapse images were collected every 10 min for 3 h with a shorter  
647 exposure time of 150 ms, except fluorescence images from the microfluidics device were  
648 collected every 5 min.

649

### 650 **Microfluidic devices**

651 The microfluidic single-cell imaging device (“mother machine”) was prepared as in (Uphoff,  
652 2018). The device was designed using Autodesk AutoCAD software. The dimensions of the  
653 cell channels were 1.2  $\mu\text{m}$  x 1.2  $\mu\text{m}$  x 20  $\mu\text{m}$  and the media flow channels were 100  $\mu\text{m}$  x 25  
654  $\mu\text{m}$ . The structures were fabricated on a silicon wafer (Kavli Nanolab, Delft University)  
655 (Moolman et al., 2013) and a negative polydimethylsiloxane (PDMS) mold was created from  
656 the silicon wafer using a 5:1 mixture of monomer and curing agent (Dow Corning Sylgard  
657 184 Kit). After removing air bubbles using vacuum, the chip was cured at 65 $^{\circ}\text{C}$  for 1.5 hours.  
658 The mould was treated with Trichloro(1H,1H,2H,2H perfluorooctyl)silane (Sigma) in vacuum  
659 overnight. The PDMS device was generated from the negative mold using a 10:1 mixture of  
660 monomer and curing agent and cured at 65 $^{\circ}\text{C}$  for 1.5 hours. Media flow holes were punched  
661 through the device with 0.75 mm diameter. Cover slips were cleaned by sonication in  
662 acetone for 20 min, washing with dH<sub>2</sub>O, sonication in isopropanol for 20 min, and dried  
663 with nitrogen. The PDMS device was washed with isopropanol and dried with nitrogen. The  
664 device and a cover slip were bonded using air plasma (Plasma Etch PE-50) and placed in an  
665 oven at 95 $^{\circ}\text{C}$  for 30 min. Cells were pipetted into the device and the device was centrifuged  
666 at 4000 rpm for 10 min to place cells into the channels. The media supplemented by  
667 Pluronic F127 was fed into the device through silicon tubing (Tygon ND 100-80 microbore,  
668 VWR) using a motorized infusion pump (New Era Pump Systems). Initially, a high flow rate of  
669 1.5 ml/hr was applied to flush the excess cells and then lowered to 0.5 ml/hr. After this, cells  
670 were allowed to grow for  $\sim$ 2 h before starting the time-lapse imaging.

671

### 672 **Image analysis**

673 Cell based information, including cell outlines, lineages, pole ages, per pixel fluorescence  
674 intensities, and fluorescent marker localization, was extracted using SuperSegger (Stylianidou  
675 et al., 2016) in MATLAB (MathWorks). SuperSegger uses an image-curvature method to  
676 identify foci to avoid the identification of false positive foci due to background intensity from  
677 cytoplasmic fluorescence and uses a gaussian fit to find the subpixel resolution location of  
678 foci. Focus quality is determined by a combination of intensity and fitting parameters and bad  
679 quality foci were filtered out. A threshold value was confirmed by visual inspection and the

680 same threshold was used for all compared data sets. The channels were aligned prior to  
681 analysis.

682

### 683 *Mother machine analysis*

684 From the lineage data, cells were classified as 'normal' growing cells, anucleate cells, mothers  
685 of anucleate cells and sisters of anucleate cells. Cells that disappeared early or didn't have a  
686 tracked lineage were excluded from the analysis. Anucleate cells were considered as cells that  
687 didn't divide, didn't elongate and lacked an *ori1* marker present, while its sister cell elongated  
688 and divided normally, and had *ori1* marker(s). If neither of the sister cells divided normally,  
689 cells were excluded from analysis. The older pole of the anucleate cell was traced back  $\geq 2$   
690 generations to determine whether the anucleate cell formed on the older or newer pole of  
691 the mother. The cell size at birth (Fig. S1B) was determined at the first frame of each cell and  
692 the number of *ori1* foci prior to division (Fig. 1C) at the last frame of a cell.

693

### 694 *Fluorescent marker localization*

695 For *ori1*, *ter3*, *L3* and *R3* markers, intensity profiles with different cell lengths were  
696 normalized, as the expectation is that a cell will have at least a single focus at all times. As  
697 cell orientation is random relative to the pole age, cells were oriented to place *L3* more  
698 towards the negative pole than *R3* and, in the *ori1* data, *ter3* was oriented more towards  
699 the negative pole. To determine flipping frequency of *L3-R3-L3-R3* markers from time-lapse  
700 imaging, first mother cells that contained at *L3-R3-L3-R3* or *R3-L3-R3-L3* were identified.  
701 Next, their daughter cells with *L3-R3-L3-R3* or *R3-L3-R3-L3* were identified. The angle (Fig.  
702 S2) between vectors pointing from the more polar *L3* to the more polar *R3* was calculated  
703 between mother and daughter cells. If the angle exceeded  $90^\circ$ , the chromosome orientation  
704 was considered flipped. To measure width of a unimodal distribution and to avoid  
705 inaccuracy from binning the data, the data was fitted by a kernel distribution in MATLAB  
706 and full width at half maximum (FWHM) was calculated from the fitted distribution.

707

### 708 *EdU pulse labelling*

709 A functional HaloTag fusion of the endogenous *tsr* gene was used in the EdU labeling, as click-  
710 chemistry reaction conditions are detrimental to conventional fluorescent proteins. To  
711 measure EdU association with the older pole, the following criteria were used to select cells  
712 from an asynchronous cell population (see Fig. S4). First, Otsu's thresholding (Otsu, 1979) was  
713 used to segment nucleoid area(s) from the cellular background and only cells that have two  
714 separate, large-enough nucleoid areas were analysed. Second, a cell must exhibit a clear  
715 difference in polar Tsr intensity. The center line of a cell was extracted to find coordinates of  
716 cell poles by fitting a cell mask to a second-order curve. The intersection of the cell mask  
717 border and the curve was used to define cell poles. Median Tsr intensity of the cell area was  
718 subtracted from all Tsr pixel intensities and a sum of 9 brightest pixels from each pole were  
719 used to quantify the pole intensity. To minimize effects of noise and discrete pixel size in  
720 segmentation, only cells with  $>1.5$ -fold difference in polar Tsr intensity were analysed. The  
721 pole that had a higher intensity of Tsr was designated as the older pole. Third, only one of the  
722 nucleoids must be labelled by EdU. EdU with short incorporation times appear as distinct foci  
723 (see Fig. 4 and Fig. S4). The foci below a fixed threshold for the score were discarded. The foci

724 were mapped to the nucleoids by projecting coordinates of both on the center line of the cell.  
725 With these criteria, the processed microscopy data from SuperSegger was automatically  
726 analysed to extract the result of EdU association with older cell pole. To avoid segmentation  
727 errors of the cell area, correct cell segmentation was visually inspected and inaccurately  
728 segmented cells were removed.

729

#### 730 *Tsr time-lapse*

731 The accuracy of Tsr-based identification of the old cell pole in our growth conditions was  
732 estimated by tracking cells with a functional mYpet fusion to the endogenous *tsr* gene over  
733 generations under a microscope. Only cells that both were born and divided during the  
734 time-lapse were analysed. Tsr intensity at each pole was calculated with same criteria as in  
735 the EdU experiment. The accuracy of Tsr as the older pole marker was determined for each  
736 frame separately by comparing results between Tsr intensity analysis and lineage tracking.  
737 The accuracy (Fig. 4D) was shown for the last frame prior to division to mimic the EdU  
738 experiment where only cells with segregated chromosomes were analysed.

739

#### 740 **Acknowledgements**

741 We thank other members of the Sherratt and Uphoff group, and Katarzyna Ginda-Mäkelä  
742 for insightful discussions. The research was supported by a Wellcome Investigator Award to  
743 DJS (200782/Z/16/Z). SU was in receipt of a Henry Dale-Wellcome Fellowship.

744

#### 745 **Author contributions**

746 JM and DJS conceived the project and directed it. JM undertook and analyzed experiments.  
747 SU developed the microfluidics, advised on its use and was generally involved in project  
748 discussions. JM, SU and DJS wrote the paper.

749

#### 750 **Conflict of interest**

751 The authors declare no competing interests.

752

#### 753 **Data and code availability**

754 All data required to understand and assess the conclusions of the research are available in  
755 the main text and supplementary materials. All materials and codes are available upon  
756 reasonable request.

757

## 758 References

- 759 Bachmann, B.J. (1996). Derivation and Genotypes of Some Mutant Derivatives of *Escherichia*  
760 *coli* K-12. *Escherichia Coli Salmonella Typhimurium Cell. Mol. Biol. ASM*, 2460–2488.
- 761 Badrinarayanan, A., Reyes-Lamothe, R., Uphoff, S., Leake, M.C., and Sherratt, D.J. (2012). In  
762 Vivo Architecture and Action of Bacterial Structural Maintenance of Chromosome Proteins.  
763 *Science* 338, 528–531.
- 764 Badrinarayanan, A., Le, T.B.K., and Laub, M.T. (2015). Bacterial Chromosome Organization  
765 and Segregation. *Annu. Rev. Cell Dev. Biol.* 31, 171–199.
- 766 Banaz, N., Mäkelä, J., and Uphoff, S. (2019). Choosing the right label for single-molecule  
767 tracking in live bacteria: Side-by-side comparison of photoactivatable fluorescent protein  
768 and Halo tag dyes. *J. Phys. D. Appl. Phys.* 52, 064002.
- 769 Ben-Yehuda, S., Rudner, D.Z., and Losick, R. (2003). RacA, a bacterial protein that anchors  
770 chromosomes to the cell poles. *Science* 299, 532–536.
- 771 Bergmiller, T., Andersson, A.M.C., Tomasek, K., Balleza, E., Kiviet, D.J., Hauschild, R., Tkačik,  
772 G., and Guet, C.C. (2017). Biased partitioning of the multidrug efflux pump AcrAB-TolC  
773 underlies long-lived phenotypic heterogeneity. *Science* 356, 311–315.
- 774 Brézellec, P., Hoebeke, M., Hiet, M.S., Pasek, S., and Ferat, J.L. (2006). DomainSieve: A  
775 protein domain-based screen that led to the identification of dam-associated genes with  
776 potential link to DNA maintenance. *Bioinformatics* 22, 1935–1941.
- 777 Cairns, J. (1975). Mutation selection and the natural history of cancer. *Nature* 255, 197–200.
- 778 Casadesús, J., and Low, D.A. (2013). Programmed heterogeneity: Epigenetic mechanisms in  
779 bacteria. *J. Biol. Chem.* 288, 13929–13935.
- 780 Cass, J.A., Kuwada, N.J., Traxler, B., and Wiggins, P.A. (2016). *Escherichia coli* Chromosomal  
781 Loci Segregate from Midcell with Universal Dynamics. *Biophys. J.* 110, 2597–2609.
- 782 Danilova, O., Reyes-Lamothe, R., Pinskaya, M., Sherratt, D., and Possoz, C. (2007). MukB  
783 colocalizes with the oriC region and is required for organization of the two *Escherichia coli*  
784 chromosome arms into separate cell halves. *Mol. Microbiol.* 65, 1485–1492.
- 785 Datsenko, K.A., and Wanner, B.L. (2000). One-step inactivation of chromosomal genes in  
786 *Escherichia coli* K-12 using PCR products. *Proc Natl Acad Sci U S A* 97, 6640– 6645.
- 787 David, A., Demarre, G., Muresan, L., Paly, E., Barre, F.X., and Possoz, C. (2014). The Two Cis-  
788 Acting Sites, parS1 and oriC1, Contribute to the Longitudinal Organisation of *Vibrio cholerae*  
789 Chromosome I. *PLoS Genet.* 10, e1004448.
- 790 Davidson, I.F., Bauer, B., Goetz, D., Tang, W., Wutz, G., and Peters, J.-M. (2019). DNA loop  
791 extrusion by human cohesin. *Science* 3418, 1–13.
- 792 Ebersbach, G., Briegel, A., Jensen, G.J., and Jacobs-Wagner, C. (2008). A Self-Associating  
793 Protein Critical for Chromosome Attachment, Division, and Polar Organization in  
794 *Caulobacter*. *Cell* 134, 956–968.
- 795 Errington, J., and Wake, R.G. (1991). Chromosome strand segregation during sporulation in  
796 *Bacillus subtilis*. *Mol. Microbiol.* 5, 1145–1149.
- 797 Espéli, O., Borne, R., Dupaigne, P., Thiel, A., Gigant, E., Mercier, R., and Bocard, F. (2012). A  
798 MatP-divisome interaction coordinates chromosome segregation with cell division in *E. coli*.  
799 *EMBO J.* 31, 3198–3211.
- 800 Fisher, J.K., Bourniquel, A., Witz, G., Weiner, B., Prentiss, M., and Kleckner, N. (2013). Four-  
801 Dimensional Imaging of *E. coli* Nucleoid Organization and Dynamics in Living Cells. *Cell* 153,  
802 882–895.
- 803 Fogel, M.A., and Waldor, M.K. (2005). Distinct segregation dynamics of the two *Vibrio*  
804 *cholerae* chromosomes. *Mol. Microbiol.* 55, 125–136.



- 805 Fritsche, M., Li, S., Heermann, D.W., and Wiggins, P.A. (2012). A model for *Escherichia coli*  
806 chromosome packaging supports transcription factor-induced DNA domain formation.  
807 *Nucleic Acids Res.* *40*, 972–980.
- 808 Ganji, A.M., Shaltiel, I.A., Bisht, S., Kim, E., Kalichava, A., Haering, C.H., and Dekker, C. (2018).  
809 Real-time imaging of DNA loop extrusion by condensin. *Science* *7831*, 1–9.
- 810 Goloborodko, A., Imakaev, M. V., Marko, J.F., and Mirny, L. (2016). Compaction and  
811 segregation of sister chromatids via active loop extrusion. *Elife* *5*, 1–16.
- 812 Hiraga, S., Niki, H., Ogura, T., Ichinose, C., Mori, H., Ezaki, B., and Jaffe, A. (1989).  
813 Chromosome partitioning in *Escherichia coli*: novel mutants producing anucleate cells. *J.*  
814 *Bacteriol.* *171*, 1496–1505.
- 815 Japaridze, A., Gogou, C., Kerssemakers, J.W.J., Nguyen, H.M., and Dekker, C. (2020). Direct  
816 observation of independently moving replisomes in *Escherichia coli*. *Nat. Commun.* *3109*.
- 817 Jun, S., and Mulder, B. (2006). Entropy-driven spatial organization of highly confined  
818 polymers: lessons for the bacterial chromosome. *Proc. Natl. Acad. Sci. U. S. A.* *103*, 12388–  
819 12393.
- 820 Kuzminov, A. (2014). The precarious prokaryotic chromosome. *J. Bacteriol.* *196*, 1793–1806.
- 821 Lansdorp, P.M. (2007). Immortal Strands? Give Me a Break. *Cell* *129*, 1244–1247.
- 822 Mäkelä, J., and Sherratt, D.J. (2020). Organization of the *Escherichia coli* Chromosome by a  
823 MukBEF Axial Core. *Mol. Cell* *78*, 250–260.
- 824 Mangiameli, S.M., Veit, B.T., Merrikh, H., and Wiggins, P.A. (2017). The Replisomes Remain  
825 Spatially Proximal throughout the Cell Cycle in Bacteria. *PLOS Genet.* *13*, e1006582.
- 826 Marczynski, G.T., Dingwall, A., and Shapiro, L. (1990). Plasmid and chromosomal DNA  
827 replication and partitioning during the *Caulobacter crescentus* cell cycle. *J. Mol. Biol.* *212*,  
828 709–722.
- 829 Marko, J.F., and Siggia, E.D. (1997). Polymer models of meiotic and mitotic chromosomes.  
830 *Mol. Biol. Cell* *8*, 2217–2231.
- 831 McKenzie, G.J., and Craig, N.L. (2006). Fast, easy and efficient: Site-specific insertion of  
832 transgenes into Enterobacterial chromosomes using Tn7 without need for selection of the  
833 insertion event. *BMC Microbiol.* *6*, 39.
- 834 Mercier, R., Petit, M.A., Schbath, S., Robin, S., El Karoui, M., Boccard, F., and Espéli, O.  
835 (2008). The MatP/matS Site-Specific System Organizes the Terminus Region of the *E. coli*  
836 Chromosome into a Macrodome. *Cell* *135*, 475–485.
- 837 Monterroso, B., Zorrilla, S., Sobrinos-Sanguino, M., Robles-Ramos, M.Á., Alfonso, C.,  
838 Söderström, B., Meiresonne, N.Y., Verheul, J., Den Blaauwen, T., and Rivas, G. (2019). The  
839 bacterial DNA binding protein matp involved in linking the nucleoid terminal domain to the  
840 divisome at midcell interacts with lipid membranes. *MBio* *10*, 1–14.
- 841 Moolman, M.C., Huang, Z., Krishnan, S.T., Kerssemakers, J.W.J., and Dekker, N.H. (2013).  
842 Electron beam fabrication of a microfluidic device for studying submicron-scale bacteria. *J.*  
843 *Nanobiotechnology* *11*, 12.
- 844 Moolman, M.C., Krishnan, S.T., Kerssemakers, J.W., van den Berg, A., Tulinski, P., Depken,  
845 M., Reyes-Lamothe, R., Sherratt, D.J., and Dekker, N.H. (2014). Slow unloading leads to DNA-  
846 bound beta2-sliding clamp accumulation in live *Escherichia coli* cells. *Nat Commun* *5*, 5820.
- 847 Nielsen, H.J., Ottesen, J.R., Youngren, B., Austin, S.J., and Hansen, F.G. (2006). The  
848 *Escherichia coli* chromosome is organized with the left and right chromosome arms in  
849 separate cell halves. *Mol. Microbiol* *62*, 331–338.
- 850 Niki, H., and Jaffe, A. (1991). The new gene mukB codes for a 177 kd protein with coiled coil  
851 domains involved in chromosome partitioning of *E. coli*. *EMBO J.* *10*, 183–193.

- 852 Nolivos, S., and Sherratt, D. (2014). The bacterial chromosome: Architecture and action of  
853 bacterial SMC and SMC-like complexes. *FEMS Microbiol. Rev.* *38*, 380–392.
- 854 Nolivos, S., Upton, A.L., Badrinarayanan, A., Müller, J., Zawadzka, K., Wiktor, J., Gill, A.,  
855 Arciszewska, L., Nicolas, E., and Sherratt, D. (2016). MatP regulates the coordinated action  
856 of topoisomerase IV and MukBEF in chromosome segregation. *Nat. Commun.* *7*, 10466.
- 857 Nolivos, S., Cayron, J., Dedieu, A., Page, A., Delolme, F., and Lesterlin, C. (2019). Role of  
858 AcrAB-TolC multidrug efflux pump in drug-resistance acquisition by plasmid transfer.  
859 *Science* *364*, 778–782.
- 860 Osley, M.A., and Newton, A. (1974). Chromosome segregation and development in  
861 *Caulobacter crescentus*. *J. Mol. Biol.* *90*, 359–370.
- 862 Otsu, N. (1979). A threshold selection method from gray-level histograms. *IEEE Trans. Sys.*  
863 *Man. Cyber.* *9*, 62–66.
- 864 Ozaki, S., Matsuda, Y., Keyamura, K., Kawakami, H., Noguchi, Y., Kasho, K., Nagata, K.,  
865 Masuda, T., Sakiyama, Y., and Katayama, T. (2013). A replicase clamp-binding dynamin-like  
866 protein promotes colocalization of nascent DNA strands and equipartitioning of  
867 chromosomes in *E. coli*. *Cell Rep.* *4*, 985–995.
- 868 Petrushenko, Z.M., She, W., and Rybenkov, V. V. (2011). A new family of bacterial  
869 condensins. *Mol. Microbiol.* *81*, 881–896.
- 870 Ping, L., Weiner, B., and Kleckner, N. (2008). Tsr-GFP accumulates linearly with time at cell  
871 poles, and can be used to differentiate “old” versus “new” poles, in *Escherichia coli*. *Mol.*  
872 *Microbiol.* *69*, 1427–1438.
- 873 Rando, T.A. (2007). The Immortal Strand Hypothesis: Segregation and Reconstruction. *Cell*  
874 *129*, 1239–1243.
- 875 Reyes-Lamothe, R., Possoz, C., Danilova, O., and Sherratt, D.J. (2008). Independent  
876 Positioning and Action of *Escherichia coli* Replisomes in Live Cells. *Cell* *133*, 90–102.
- 877 Soubry, N., Wang, A., and Reyes-Lamothe, R. (2019). Replisome activity slowdown after  
878 exposure to ultraviolet light in *Escherichia coli*. *Proc. Natl. Acad. Sci. U. S. A.* *116*, 11747–  
879 11753.
- 880 Stylianidou, S., Brennan, C., Nissen, S.B., Kuwada, N.J., and Wiggins, P.A. (2016).  
881 SuperSegger: robust image segmentation, analysis and lineage tracking of bacterial cells.  
882 *Mol. Microbiol.* *102*, 690–700.
- 883 Surovtsev, I. V., and Jacobs-Wagner, C. (2018). Subcellular Organization: A Critical Feature of  
884 Bacterial Cell Replication. *Cell* *172*, 1271–1293.
- 885 Toro, E., and Shapiro, L. (2010). Bacterial Chromosome Organization and Segregation. *Cold*  
886 *Spring Harb Perspect Biol* *2*, a000349.
- 887 Uhlmann, F. (2016). SMC complexes: From DNA to chromosomes. *Nat. Rev. Mol. Cell Biol.*  
888 *17*, 399–412.
- 889 Umbarger, M.A., Toro, E., Wright, M.A., Porreca, G.J., Baù, D., Hong, S.H., Fero, M.J., Zhu,  
890 L.J., Marti-Renom, M.A., McAdams, H.H., et al. (2011). The three-dimensional architecture  
891 of a bacterial genome and its alteration by genetic perturbation. *Mol. Cell* *44*, 252–264.
- 892 Uphoff, S. (2018). Real-time dynamics of mutagenesis reveal the chronology of DNA repair  
893 and damage tolerance responses in single cells. *Proc. Natl. Acad. Sci. U. S. A.* *115*, E6516–  
894 E6525.
- 895 Vallet-Gely, I., and Boccard, F. (2013). Chromosomal Organization and Segregation in  
896 *Pseudomonas aeruginosa*. *PLoS Genet.* *9*, e1003492.
- 897 Wakeman, J.A., Hmadcha, A., Soria, B., and McFarlane, R.J. (2012). The immortal strand  
898 hypothesis: Still non-randomly segregating opinions. *Biomol. Concepts* *3*, 203–211.

- 899 Waldminghaus, T., and Skarstad, K. (2009). The *Escherichia coli* SeqA protein. *Plasmid* *61*,  
900 141–150.
- 901 Wallden, M., Fange, D., Lundius, E.G., Baltekin, O., and Elf, J. (2016). The Synchronization of  
902 Replication and Division Cycles in Individual *E. coli* Cells. *Cell* *166*, 729–739.
- 903 Wang, P., Robert, L., Pelletier, J., Dang, W.L., Taddei, F., Wright, A., and Jun, S. (2010).  
904 Robust growth of *Escherichia coli*. *Curr. Biol.* *20*, 1099–1103.
- 905 Wang, X., Possoz, C., and Sherratt, D.J. (2005). Dancing around the divisome: asymmetric  
906 chromosome segregation in *Escherichia coli*. *Genes Dev* *19*, 2367–2377.
- 907 Wang, X., Liu, X., Possoz, C., and Sherratt, D.J. (2006). The two *Escherichia coli* chromosome  
908 arms locate to separate cell halves. *Genes Dev.* *20*, 1727–1731.
- 909 Wang, X., Reyes-lamothe, R., and Sherratt, D.J. (2008). Modulation of *Escherichia coli* sister  
910 chromosome cohesion by topoisomerase. *Genes Dev.* 2426–2433.
- 911 Wang, X., Llopis, P.M., and Rudner, D.Z. (2013). Organization and segregation of bacterial  
912 chromosomes. *Nat. Rev. Genet.* *14*, 191–203.
- 913 Wang, X., Montero Llopis, P., and Rudner, D.Z. (2014). *Bacillus subtilis* chromosome  
914 organization oscillates between two distinct patterns. *Proc. Natl. Acad. Sci. U. S. A.* *2014*, 1–  
915 6.
- 916 White, M.A., Eykelenboom, J.K., Lopez-Vernaza, M.A., Wilson, E., and Leach, D.R.F. (2008).  
917 Non-random segregation of sister chromosomes in *Escherichia coli*. *Nature* *455*, 1248–1250.
- 918 Wu, L.J., and Errington, J. (2003). RacA and the Soj-Spo0J system combine to effect polar  
919 chromosome segregation in sporulating *Bacillus subtilis*. *Mol. Microbiol.* *49*, 1463–1475.
- 920 Wu, F., Japaridze, A., Zheng, X., Wiktor, J., Kerssemakers, J.W.J., and Dekker, C. (2019).  
921 Direct imaging of the circular chromosome in a live bacterium. *Nat. Commun.* *10*, 1–9.
- 922 Yamaichi, Y., Bruckner, R., Ringgaard, S., Möll, A., Ewen Cameron, D., Briegel, A., Jensen,  
923 G.J., Davis, B.M., and Waldor, M.K. (2012). A multidomain hub anchors the chromosome  
924 segregation and chemotactic machinery to the bacterial pole. *Genes Dev.* *26*, 2348–2360.
- 925 Yang, S., Kim, S., Kim, D.K., Jeon An, H., Bae Son, J., Hedén Gynnå, A., and Ki Lee, N. (2019).  
926 Transcription and translation contribute to gene locus relocation to the nucleoid periphery  
927 in *E. coli*. *Nat. Commun.* *10*, 1–12.
- 928 Zawadzki, P., Stracy, M., Ginda, K., Zawadzka, K., Lesterlin, C., Kapanidis, A.N., and Sherratt,  
929 D.J. (2015). The Localization and Action of Topoisomerase IV in *Escherichia coli* Chromosome  
930 Segregation Is Coordinated by the SMC Complex, MukBEF. *Cell Rep.* *13*, 2587–2596.
- 931

932 **Supplementary Figures**

933

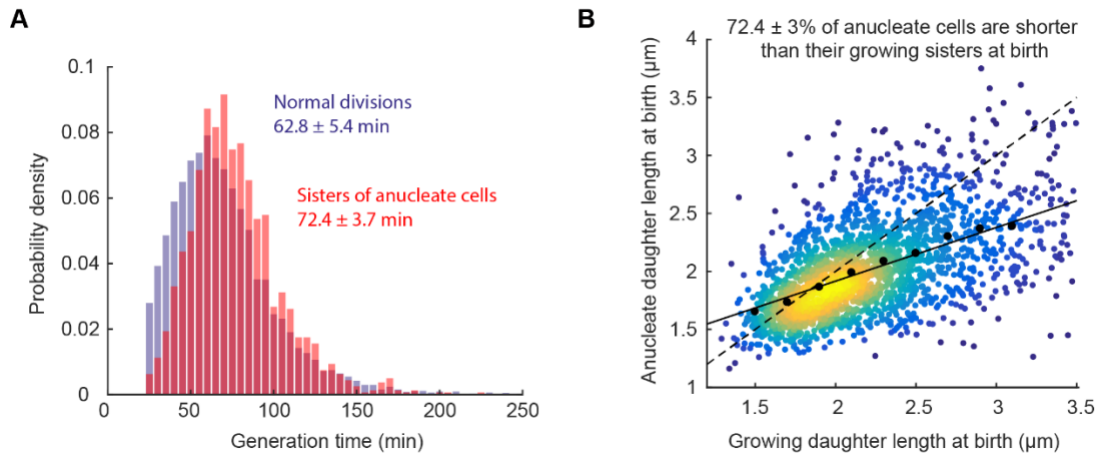

934

935 **Fig. S1. (A)** Generation time in normally dividing cells (12103 cells) and in sisters of  
936 anucleate cells (1605 cells). Two-sample t-test of mean generation time p-value 0.2176.  
937 Data from 3 repeats. **(B)** Difference in cell length at birth between anucleate and growing  
938 sister cells at anucleate cell division. Black dashed line indicates symmetric division and solid  
939 line shows a linear fit to the data. Black circles show binned mean. 2266 cell pairs from 3  
940 repeats.

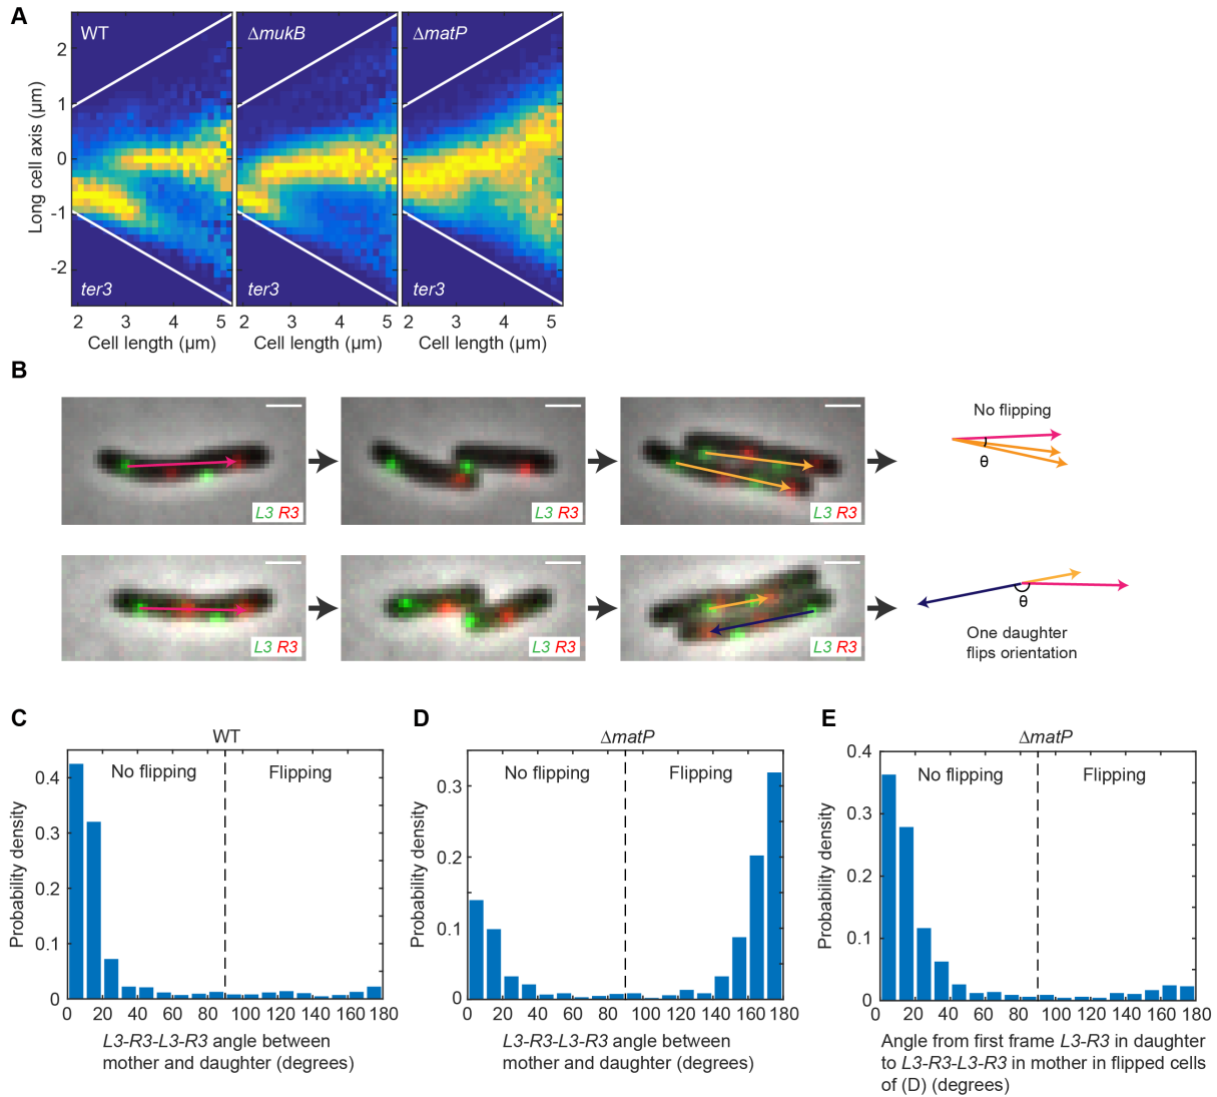

941

942 **Fig. S2.** (A) *ter3* localization along long cell axis in WT (26926 cells),  $\Delta mukB$  (48770 cells) and  
 943  $\Delta matP$  (45532 cells). From same data as in Fig. 2D; *ter3* is oriented more towards the  
 944 negative pole than *ori1*. Data from 3 repeats. (B) Representative time-lapse images of WT  
 945 (top) and  $\Delta matP$  (bottom) cells with *L3* and *R3* markers. (top) *L3-R3-L3-R3* orientation is  
 946 maintained over a generation while (bottom) *L3-R3-L3-R3* orientation is flipped. From *L3-R3-*  
 947 *L3-R3* cells, angle between vectors pointing from the more polar *L3* to the more polar *R3* is  
 948 calculated between mother cell (red arrow) and daughter cells (orange arrow) and, if the  
 949 angle exceeds  $90^\circ$ , the chromosome orientation is considered flipped (blue arrow). Scale  
 950 bars:  $1 \mu\text{m}$ . Angle between mother and daughter cell *L3-R3-L3-R3* vectors in (C) WT (859  
 951 pairs) and (D)  $\Delta matP$  (1054 pairs) cells. Data from 3 repeats. (E) Angle between *L3-R3*  
 952 vector in first frame of daughter cell and *L3-R3-L3-R3* vector in mother cell in flipped cells  
 953 of (D). Same data is in (D).

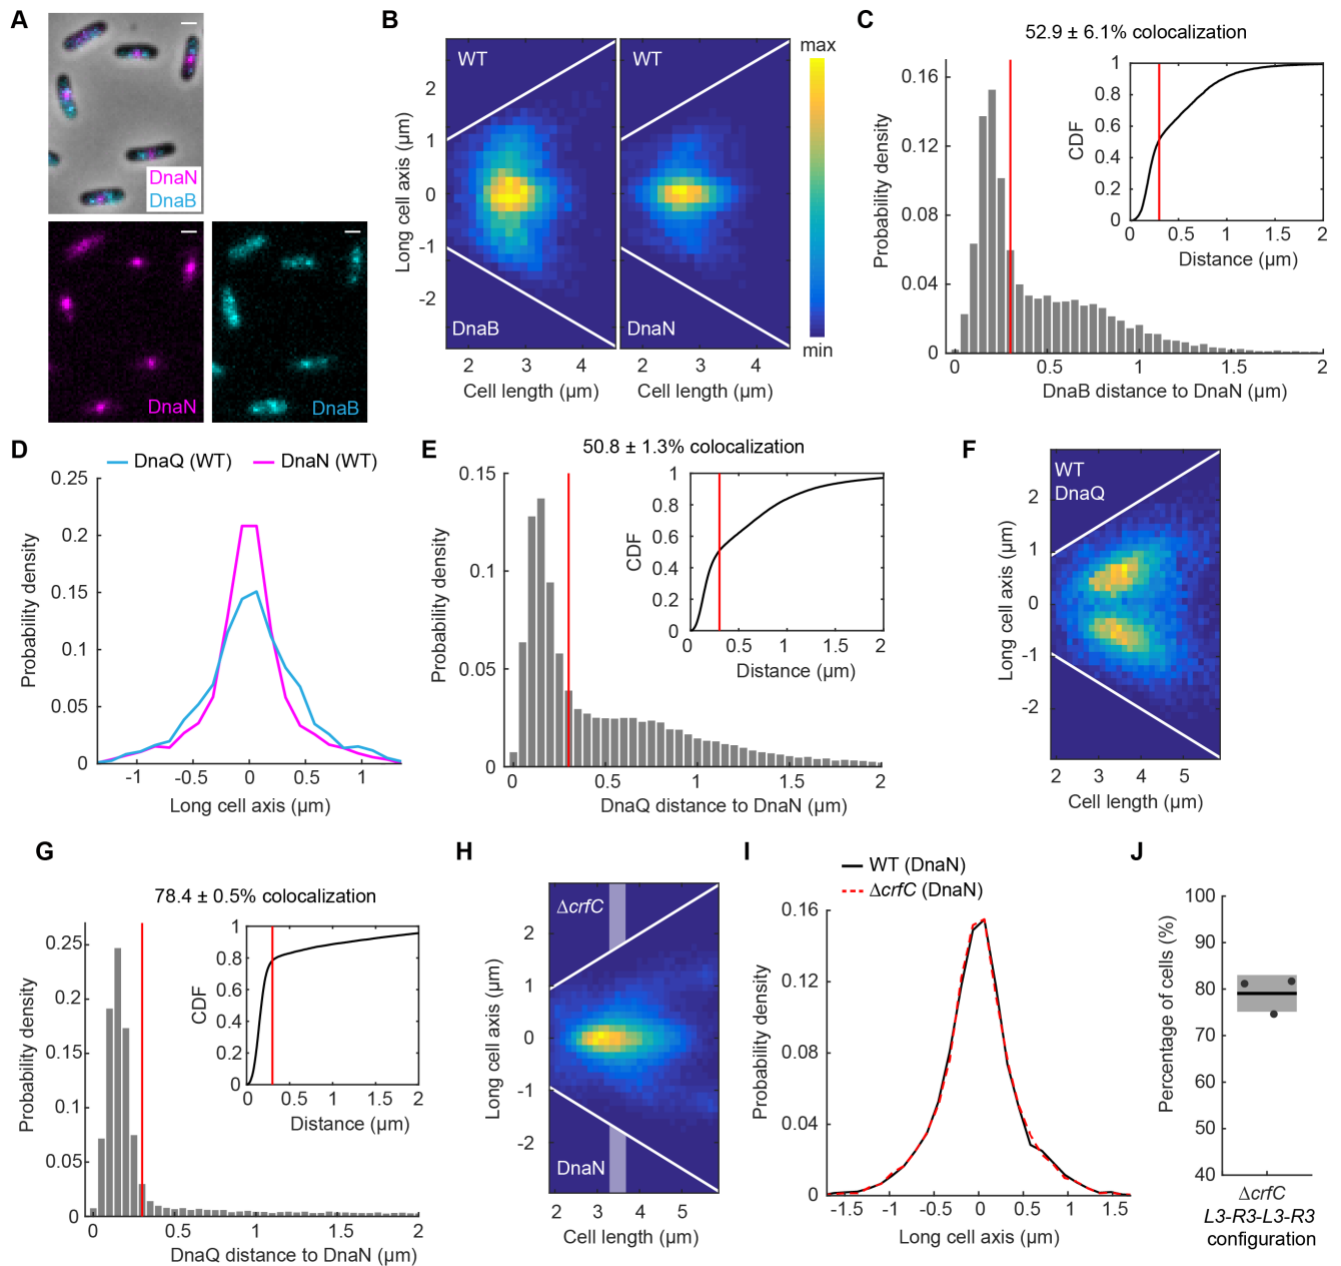

954

955 **Fig. S3. (A)** Representative images of WT cells with labelled DnaN and DnaB. Scale bars: 1  
 956  $\mu\text{m}$ . **(B)** DnaB and DnaN localization in WT cells as a function of cell length (16134 cells).  
 957 White lines denote cell borders. **(C)** Distance from a DnaB locus to the closest DnaN locus.  
 958 DnaB and DnaN colocalize in  $52.9 \pm 6.1\%$  ( $\pm\text{SD}$ ) of pairs (11714 pairs) as defined by a  
 959 threshold (red lines) below which two proteins colocalize (dictated by a diffraction limit of  
 960  $300\text{ nm}$ ). Inset shows the same data as a cumulative distribution. Same data as in (B). **(D)**  
 961 DnaQ (4567 spots) or DnaN (5393 spots) localization with early replication cells in WT (cell  
 962 lengths  $2.5\text{-}2.9\ \mu\text{m}$ ) (same data as in Fig. 3C). **(E)** Distance from a DnaQ locus to the closest  
 963 DnaN locus in  $\Delta\text{matP}$  cells. DnaQ and DnaN colocalize in  $50.8 \pm 1.3\%$  ( $\pm\text{SD}$ ) of pairs (46330  
 964 pairs). Inset shows the same data as a cumulative distribution. Same data as in (Fig. 3F). **(F)**  
 965 DnaQ localization as a function of cell length in WT cells in which DnaQ foci are spatially  
 966 separate from DnaN (16158 cells). Same data as in Fig. 2C and D. **(G)** Distance from a DnaQ  
 967 locus to the closest DnaN locus in  $\Delta\text{mukB}$  cells. DnaQ and DnaN colocalize in  $78.4 \pm 0.5\%$

968 ( $\pm$ SD) of pairs (32603 pairs). Inset shows the same data as a cumulative distribution. Same  
969 data as in (Fig. 3G). **(H)** DnaN localization in  $\Delta crfC$  cells as a function of cell length (49955  
970 cells). Shaded areas denote intermediate cell lengths for localization data in (I). White lines  
971 denote cell borders. **(I)** DnaN localization with intermediate cell lengths (3.3-3.7  $\mu$ m) in WT  
972 (8006 spots) and  $\Delta crfC$  (10691). Data from (H) and Fig. 3E. **(J)** Percentage of  $\Delta crfC$  cells (8393  
973 cells) with *L3-R3-L3-R3* (or *R3-L3-R3-L3*) configuration (versus *L3-R3-R3-L3* or *R3-L3-L3-R3*) in  
974 double *L3* and *R3* focus cells. All data from 3 repeats.  
975

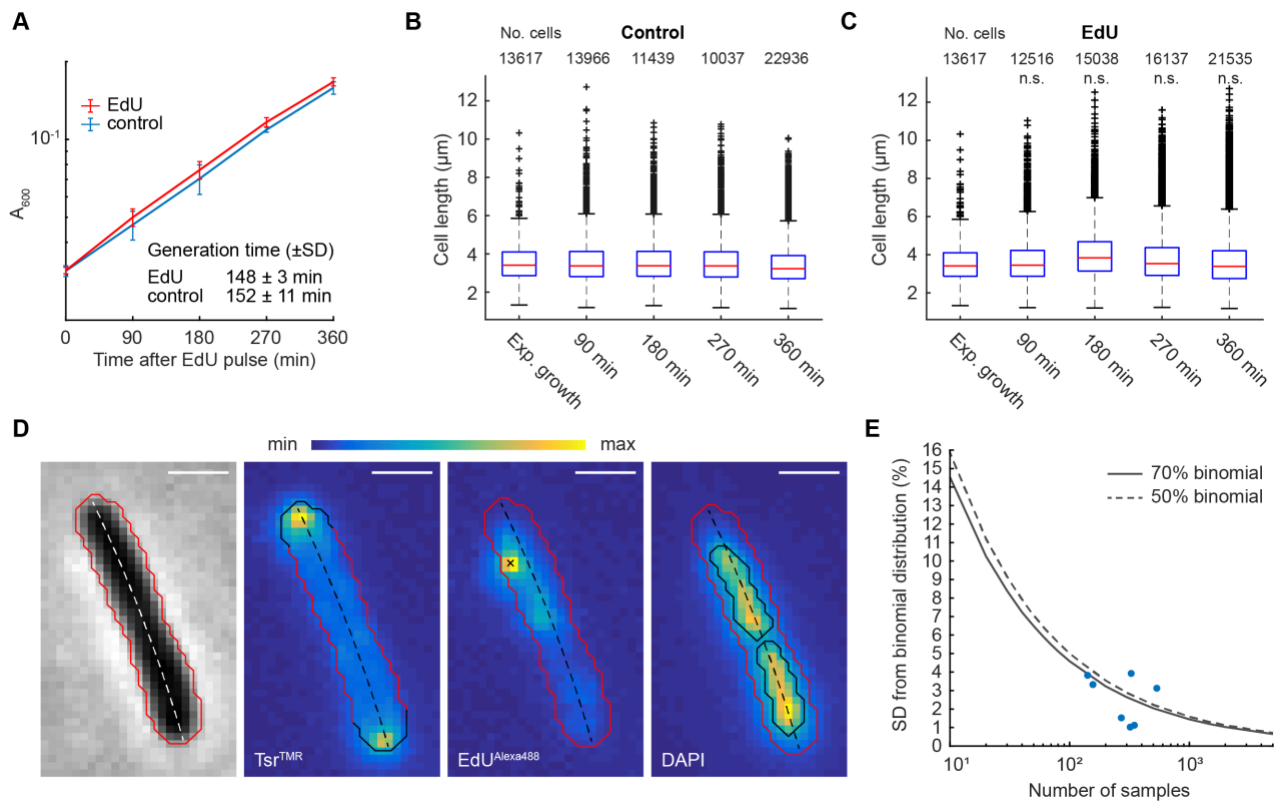

976

977 **Fig. S4.** (A) Cell growth following a 15 min EdU pulse compared to no EdU. Cell length at  
 978 different time intervals (B) without or (C) with EdU pulse. n.s. indicates two-sample t-test of  
 979 mean cell length compared to control p-value > 0.01. Data from 3 repeats. (D) Image  
 980 analysis of EdU experiment. A representative cell after EdU protocol showing Tsr<sup>TMR</sup>,  
 981 EdU<sup>Alexa488</sup> and DAPI labelling. Red line is the cell border and dashed line shows the center  
 982 line of the cell. Black line in Tsr<sup>TMR</sup> channel shows the pole areas from where the Tsr  
 983 intensity is calculated. Black cross in EdU<sup>Alexa488</sup> channel indicates a detected EdU focus.  
 984 Black lines in DAPI channel indicate segmented nucleoid areas. For more information see  
 985 Methods. Scale bars: 1  $\mu\text{m}$  (E) Accuracy of the retention measurement as function of sample  
 986 size. Different sample sizes were drawn from a binomial distribution with 50% (dashed line)  
 987 or 70% (solid line) success rate and SD was calculated between them ( $10^5$  repeats for each  
 988 value). The data from Fig. 5 are shown with dots.

989

990



991 **Table S1.** Strain list.

| Strain | Relevant genotype                                                                                                                                                                                                                                    | Source or reference                                     |
|--------|------------------------------------------------------------------------------------------------------------------------------------------------------------------------------------------------------------------------------------------------------|---------------------------------------------------------|
| AB1157 | $F^-$ , $\lambda^-$ , $rac^-$ , $thi-1$ , $hisG4$ , $\Delta(gpt-proA)62$ , $argE3$ , $thr-1$ , $leuB6$ , $kdgK51$ , $rfbD1$ , $araC14$ , $lacY1$ , $galK2$ , $xylA5$ , $mtl-1$ , $tsx-33$ , $supE44(glnV44)$ , $rpsL31(str^R)$ , $qsr'-0$ , $mgI-51$ | Coli Genetic Stock Center (CGSC) #1157 (Bachmann, 1996) |
| AU2101 | AB1157, $lacO240$ at $ori1$ (3908) ( <i>hyg</i> ), $tetO240$ at $ter3$ (1644) ( <i>gen</i> ), $\Delta leuB::Plac-lacI-mCherry-frt$ , $\Delta galK::Plac-tetR-mCerulean-frt$ , $\Delta mukB::kan$                                                     | (Nolivos et al., 2016)                                  |
| JM09   | AB1157, $lacO240$ at $ori1$ (3908) ( <i>hyg</i> ), $tetO240$ at $ter3$ (1644) ( <i>gen</i> ), $\Delta leuB::Plac-lacI-mCherry-frt$ , $\Delta galK::Plac-tetR-mCerulean-frt$ , $attTn7-GFPmut2$ , $\Delta flhd-frt$ , $\Delta mukB::kan$              | This study                                              |
| JM122  | AB1157, $tsr-HaloTag-kan$                                                                                                                                                                                                                            | This study                                              |
| JM127  | AB1157, $tsr-HaloTag-frt$ , $\Delta matP::kan$                                                                                                                                                                                                       | This study                                              |
| JM128  | AB1157, $tsr-HaloTag-frt$ , $\Delta seqA::kan$                                                                                                                                                                                                       | This study                                              |
| JM130  | AB1157, $tsr-HaloTag-frt$ , $\Delta dam::kan$                                                                                                                                                                                                        | This study                                              |
| JM131  | AB1157, $tsr-HaloTag-frt$ , $\Delta mukB::kan$                                                                                                                                                                                                       | This study                                              |
| JM133  | AB1157, $tsr-mYpet-kan$                                                                                                                                                                                                                              | This study                                              |
| JM135  | AB1157, $lacO240$ at L3 (2268) ( <i>hyg</i> ), $tetO240$ at R3 (852) ( <i>gen</i> ), $\Delta leuB::Plac-lacI-mCherry-frt$ , $\Delta galK::Plac-tetR-mCerulean-frt$ , $\Delta matP::kan$                                                              | This study                                              |
| JM136  | AB1157, $tsr-HaloTag-frt$ , $matP\Delta C20-kan$                                                                                                                                                                                                     | This study                                              |
| JM137  | AB1157, $tsr-HaloTag-frt$ , $\Delta zapB::kan$                                                                                                                                                                                                       | This study                                              |
| JM140  | AB1157, $lacO240$ at L3 (2268) ( <i>hyg</i> ), $tetO240$ at R3 (852) ( <i>gen</i> ), $\Delta leuB::Plac-lacI-mCherry-frt$ , $\Delta galK::Plac-tetR-mCerulean-frt$ , $\Delta mukB::kan$                                                              | This study                                              |
| JM141  | AB1157, $frt-mCherry-dnaN$ , $dnaQ-Ypet-kan$                                                                                                                                                                                                         | This study                                              |
| JM142  | AB1157, $frt-mCherry-dnaN$ , $\Delta yjdA::kan$                                                                                                                                                                                                      | This study                                              |
| JM143  | AB1157, $lacO240$ at L3 (2268) ( <i>hyg</i> ), $tetO240$ at R3 (852) ( <i>gen</i> ), $\Delta leuB::Plac-lacI-mCherry-frt$ , $\Delta galK::Plac-tetR-mCerulean-frt$ , $\Delta yjdA::kan$                                                              | This study                                              |
| JM150  | AB1157, $frt-mCherry-dnaN$ , $dnaQ-Ypet-frt$ , $\Delta matP::kan$                                                                                                                                                                                    | This study                                              |
| JM152  | AB1157, $frt-mCherry-dnaN$ , $dnaQ-Ypet-frt$ , $\Delta mukB::kan$                                                                                                                                                                                    | This study                                              |
| JW4070 | $\Delta yjdA::kan$                                                                                                                                                                                                                                   | Coli Genetic Stock Center (CGSC) #10929                 |
| RRL36  | AB1157, $dnaQ-Ypet-kan$                                                                                                                                                                                                                              | (Reyes-Lamothe et al., 2008)                            |
| RRL66  | AB1157, $lacO240$ at L3 (2268) ( <i>hyg</i> ), $tetO240$ at R3 (852) ( <i>gen</i> ), $\Delta leuB::Plac-lacI-mCherry-frt$ , $\Delta galK::Plac-tetR-mCerulean-frt$                                                                                   | (Reyes-Lamothe et al., 2008)                            |

|        |                                                                                                                                                                                                                                                                   |                              |
|--------|-------------------------------------------------------------------------------------------------------------------------------------------------------------------------------------------------------------------------------------------------------------------|------------------------------|
| RRL189 | AB1157, <i>lacO240</i> at <i>ori1</i> (3908) ( <i>hyg</i> ), <i>tetO240</i> at <i>ter3</i> (1644) ( <i>gen</i> ), $\Delta$ <i>leuB::Plac-lacI-mCherry-frt</i> , $\Delta$ <i>galK::Plac-tetR-mCerulean-frt</i>                                                     | (Reyes-Lamothe et al., 2008) |
| RRL388 | AB1157, <i>frt-mCherry-dnaN</i>                                                                                                                                                                                                                                   | (Soubry et al., 2019)        |
| RRL396 | AB1157, <i>frt-Ypet-dnaB</i> , <i>kan-mCherry-dnaN</i>                                                                                                                                                                                                            | (Soubry et al., 2019)        |
| SN192  | AB1157, <i>lacO240</i> at <i>ori1</i> (3908) ( <i>hyg</i> ), <i>tetO240</i> at <i>ter3</i> (1644) ( <i>gen</i> ), $\Delta$ <i>leuB::Plac-lacI-mCherry-frt</i> , $\Delta$ <i>galK::Plac-tetR-mCerulean-frt</i> , <i>mukB-mYpet-frt</i>                             | (Nolivos et al., 2016)       |
| SN302  | AB1157, <i>lacO240</i> at <i>ori1</i> (3908) ( <i>hyg</i> ), <i>tetO240</i> at <i>ter3</i> (1644) ( <i>gen</i> ), $\Delta$ <i>leuB::Plac-lacI-mCherry-frt</i> , $\Delta$ <i>galK::Plac-tetR-mCerulean-frt</i> , <i>mukB-mYpet-frt</i> , $\Delta$ <i>matP::cat</i> | (Nolivos et al., 2016)       |

992

993

994

**Table S2.** Primer list

| Name     | Sequence                                                                          | Construct                                                                                                  |
|----------|-----------------------------------------------------------------------------------|------------------------------------------------------------------------------------------------------------|
| JMP48_Fw | CGCCGCGTAAAATGGCCGTGGCAGATAGCGAGGA<br>GAACTGGGAAACATTTTCGGCTGGCTCCGCTGC           | $\lambda$ -red attachment of <i>HaloTag-kan</i> or <i>mYpet-kan</i> to <i>tsr</i> at the endogenous locus. |
| JMP49_Rv | AATCTCCTTATGCCCCGATAACATTTTGCTTATCGGGCA<br>TTTTTCATGGCGATATGAATATCCTCCTTAGTTCCTAT |                                                                                                            |

995
